# Supplementary material for: Rhenium Tricarbonyl Complexes of Azodicarboxylate Ligands
Source: MDPI journal article supplement (doi:10.3390/molecules27238159), 2022-11-23
Supplement: s1 [file s1]

# Rhenium Tricarbonyl Complexes of Azodicarboxylate Ligands

Rose Jordan <sup>1</sup>, Maryam Niazi <sup>1</sup>, Sascha Schäfer <sup>1</sup> and Wolfgang Kaim <sup>2</sup> and Axel Klein <sup>1,\*</sup>

<sup>1</sup> Department für Chemie, Institut für Anorganische Chemie, Mathematisch-Naturwissenschaftliche Fakultät, Universität zu Köln, Greinstrasse 6, D-50939 Köln, Germany

<sup>2</sup> Institut für Anorganische Chemie, Universität Stuttgart, Pfaffenwaldring 55, D-70550 Stuttgart, Germany

\* Correspondence: axel.klein@uni-koeln.de; Tel.: +49-221-470-4006

## Contents

**Figure S1.** Part of the IR spectrum recorded on the reaction mixture of  $[\text{Re}(\text{CO})_3\text{Cl}]$  and adcpip.

**Figure S2.** X-band EPR spectrum of the assumed  $[\{\text{Re}(\text{CO})_3\text{Cl}\}_2(\mu\text{-adcpip})]^{*-}$  in toluene/ $\text{CH}_2\text{Cl}_2$  observed in the reaction mixture of  $[\text{Re}(\text{CO})_3\text{Cl}]$  and adcpip with simulation.

**Figure S3.** IR spectrum and X-band (9.862 GHz) EPR spectrum of the reaction mixture of  $[\{\text{Re}(\text{CO})_3\text{Cl}\}_2(\mu\text{-adcpip})]$  with 2 equivalents of  $\text{PPh}_3$  in THF.

**Figure S4.** X-band EPR spectrum of the assumed  $[\{\text{Re}(\text{CO})_3\text{Cl}\}_2(\mu\text{-adcpip})]^{*-}$  in toluene before (A) and after (B) addition of a small amount of MeCN.

**Figure S5.** 300 MHz  $^1\text{H}$  NMR spectra of adcpip (top) and  $[\text{Re}(\text{CO})_3\text{Cl}(\text{adcpip})]$  (bottom) in  $\text{CDCl}_3$ .

**Figure S6.** 75 MHz  $^{13}\text{C}$  DEPTQ NMR spectrum of  $[\text{Re}(\text{CO})_3\text{Cl}(\text{adcpip})]$  in  $\text{CDCl}_3$ .

**Figure S7.** IR spectra of  $[\text{Re}(\text{CO})_3\text{Cl}(\text{adcpip})]$ ,  $[\text{Re}(\text{CO})_3(\text{PPh}_3)(\text{adcpip})]\text{Cl}$ , and  $[\text{Re}(\text{CO})_4(\mu\text{-Cl})_2\text{Re}(\text{CO})_4]$ .

**Figure S8.** DFT-calculated IR spectra of  $[\text{Re}(\text{CO})_3\text{Cl}(\text{adcpip})]$  [Re], and  $[\{\text{Re}(\text{CO})_3\text{Cl}\}_2(\mu\text{-adcpip})]$  (*anti*-[Re]<sub>2</sub>, and *syn*-[Re]<sub>2</sub>); at TPSSH(def2-TZVP(+def2-ECP for Re)/CPCMC(THF) level of theory.

**Figure S9.** DFT-calculated IR spectra of  $[\text{Re}(\text{CO})_3\text{Cl}(\text{adcpip})]$  [Re], and  $[\{\text{Re}(\text{CO})_3\text{Cl}\}_2(\mu\text{-adcpip})]$  (*anti*-[Re]<sub>2</sub>, and *syn*-[Re]<sub>2</sub>); at M06-2X/def2TZVP/LANL2DZ/CPCM(THF) level of theory.

**Figure S10.** View on the crystal structure of  $[\text{Re}(\text{CO})_3\text{Cl}(\text{adcpip})]$  along the crystallographic *b* axis.

**Figure S11.** Views on the DFT-optimised structures in the *S*<sub>0</sub> ground state for  $[\{\text{Re}(\text{CO})_3\text{Cl}\}_2(\mu\text{-adcpip})]$ ; M06-2X/def2TZVP/LANL2DZ/CPCM(THF) level of theory.

**Figure S12.** Cyclic voltammograms of  $[\{\text{Re}(\text{CO})_3\text{Cl}\}_2(\mu\text{-adcOEt})]$  in 0.1 M *n*-Bu<sub>4</sub>NPF<sub>6</sub>/DCE.

**Figure S13.** Cyclic voltammogram of  $[\{\text{Re}(\text{CO})_3\text{Cl}\}_2(\mu\text{-adcpip})]$  in *n*-Bu<sub>4</sub>NPF<sub>6</sub>/DCE.

**Figure S14.** Cyclic voltammogram of  $[\text{Re}(\text{CO})_3(\text{PPh}_3)(\text{adcpip})]\text{Cl}$  in *n*-Bu<sub>4</sub>NPF<sub>6</sub>/DCE.

**Figure S15.** Cyclic voltammograms of  $[\text{Re}(\text{CO})_3\text{Cl}(\text{pacOEt})]$  in 0.1 M *n*-Bu<sub>4</sub>NPF<sub>6</sub>/DCE.

**Figure S16.** Cyclic voltammograms of  $[\text{Re}_2(\mu\text{-Cl})_2(\text{CO})_8]$  in 0.1 M *n*-Bu<sub>4</sub>NPF<sub>6</sub>/DCE.

**Figure S17.** X-band EPR spectra of the assumed  $[\text{Re}(\text{CO})_3(\text{CH}_2\text{Cl}_2)(\text{adcpip})]^\bullet$  and  $[\text{Re}(\text{CO})_3(\text{NEt}_3)(\text{adcpip})]^\bullet$  at 298 K.

**Figure S18.** X-band EPR spectra of the assumed  $[\text{Re}(\text{CO})_3\text{Cl}(\text{adcpip})]^{*-}$  in glassy frozen acetone matrix at 4 K.

**Figure S19.** X-band EPR spectra of assumed  $[\text{Re}(\text{CO})_3\text{Cl}(\text{adcOEt})]^{*-}$  (A) and  $[\text{Re}(\text{CO})_3\text{Cl}(\text{adcOiPr})]^{*-}$  (B) in glassy frozen acetone matrix 4 K.

**Figure S20.** DFT calculated energies of occupied MOs (blue) and unoccupied MOs (red) for the Re complexes [Re], *anti*-[Re]<sub>2</sub>, and *syn*-[Re]<sub>2</sub>; M06-2X/def2TZVP/LANL2DZ for Re/CPCM(THF) level of theory.

**Figure S21.** DFT-calculated frontier orbital landscape in the ground state (*S*<sub>0</sub>) for [Re], *anti*-[Re]<sub>2</sub>, and *syn*-[Re]<sub>2</sub>; M062X/def2TZVP/LANL2DZ/CPCM(THF) level of theory.

**Figure S22.** UV-vis-NIR absorption spectrum of  $[\{\text{Re}(\text{CO})_3\text{Cl}\}_2(\mu\text{-adcOiPr})]$  (left) and  $[\{\text{Re}(\text{CO})_3\text{Cl}\}_2(\mu\text{-adcOEt})]$  (right) in  $\text{CH}_2\text{Cl}_2$ .

**Figure S23.** TD-DFT-calculated UV-vis absorption spectra **A:** Overlay spectra of [Re], *anti*-[Re]<sub>2</sub>, and *syn*-[Re]<sub>2</sub>; **B:** [Re]; **C:** *anti*-[Re]<sub>2</sub>; **D:** *syn*-[Re]<sub>2</sub>; M06-2X/def2TZVP/LANL2DZ for Re/CPCM(THF) level of theory.

**Figure S24.** Views on the DFT-optimised structures in the *D*<sub>0</sub> ground state for  $[\text{Re}]^{*-}$ , *anti*-[Re]<sub>2</sub><sup>•-</sup>, and *syn*-[Re]<sub>2</sub><sup>•-</sup>; at BP86/def2-TZVP(+def2-ECP for Re)/CPCMC(THF) level of theory.

**Figure S25.** DFT-calculated frontier orbital landscape in the ground state (*D*<sub>0</sub>) for  $[\text{Re}]^{*-}$  and *anti*-[Re]<sub>2</sub><sup>•-</sup>; TPSSH/def2-TZVP(+def2-ECP for Re)/CPCMC(THF) level of theory.

**Table S1.** Crystal Structure and solution data of  $[\text{Re}(\text{CO})_3\text{Cl}(\text{adcpip})]$ .

**Table S2.** Selected metrics from the crystal structure of  $[\text{Re}(\text{CO})_3\text{Cl}(\text{adcpip})]$ .

**Table S3A.** Selected DFT-calculated metrics of  $[\text{Re}]$ , *anti*- $[\text{Re}]_2$  and *syn*- $[\text{Re}]_2$ , compared with  $[\text{Re}]^{\bullet-}$ , *anti*- $[\text{Re}]_2^{\bullet-}$  and *syn*- $[\text{Re}]_2^{\bullet-}$ ; at BP86/def2-TZVP(+def2-ECP for Re)/CPCMC(THF) level of theory.

**Table S3B.** Selected DFT-calculated metrics of  $[\text{Re}]$ , *anti*- $[\text{Re}]_2$  and *syn*- $[\text{Re}]_2$ ; at M06-2X/def2TZVP/LANL2DZ/CPCM(THF) level of theory.

**Table S4.** Experimental IR data of adc ligands and Re complexes.

**Table S5.** Electrochemical data of adc ligands.

**Table S6.** Selected X-band EPR data of reduced Re complexes.

**Table S7.** UV-vis long-wavelength absorption maxima of  $[\{\text{Re}(\text{CO})_3\text{Cl}\}_2(\mu\text{-adcpip})]$  in different solvents.

**Table S8.** DFT-calculated electronic transitions and character thereof for  $[\text{Re}]$ ; TPSSh/def2-TZVP(+def2-ECP for Re)/CPCMC(THF) level of theory

**Table S9.** DFT-calculated electronic transitions and character thereof for *anti*- $[\text{Re}]_2$ ; TPSSh/def2-TZVP(+def2-ECP for Re)/CPCMC(THF) level of theory.

**Table S10.** DFT-calculated electronic transitions and character thereof for *syn*- $[\text{Re}]_2$ ; TPSSh/def2-TZVP(+def2-ECP for Re)/CPCMC(THF) level of theory.

**Table S11.** DFT-calculated absorptions and character of calculated transitions for  $[\text{Re}]$ ; M06-2X/def2TZVP/LANL2DZ for Re/CPCM(THF) level of theory.

**Table S12.** DFT-calculated absorptions and character of calculated transitions for *anti*- $[\text{Re}]_2$ ; M06-2X/def2TZVP/LANL2DZ for Re/CPCM(THF) level of theory.

**Table S13.** DFT-calculated absorptions and character of calculated transitions for *syn*- $[\text{Re}]_2$ ; M06-2X/def2TZVP/LANL2DZ for Re/CPCM(THF) level of theory.

## Supporting Figures

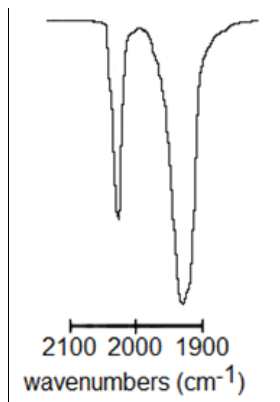

**Figure S1.** Part of the IR spectrum recorded on the reaction mixture of  $[\text{Re}(\text{CO})_5\text{Cl}]$  and adcpip.

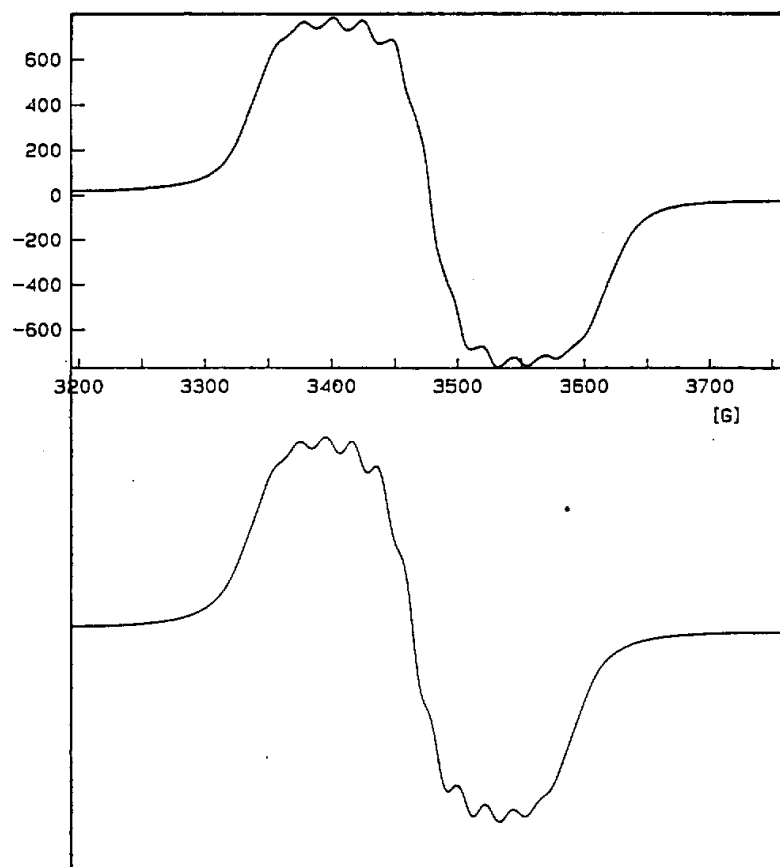

**Figure S2.** X-band EPR spectrum of the assumed  $[[\text{Re}(\text{CO})_5\text{Cl}]_2(\mu\text{-adcpip})]^{*+}$  in toluene/ $\text{CH}_2\text{Cl}_2$  (top) observed in the reaction mixture of  $[\text{Re}(\text{CO})_5\text{Cl}]$  and adcpip, measured at 9.863 GHz and 5.0 G modulation amplitude; simulation using  $A_{\text{Re}} = 22.2$  G, linewidth = 18.6 G and Lorentzian lines (bottom). Due to rapid  $\text{Cl}^-$  cleavage, the radical could also be a  $[[\text{Re}(\text{CO})_5(\text{solv})]_2(\mu\text{-adcpip})]^{*+}$  species.

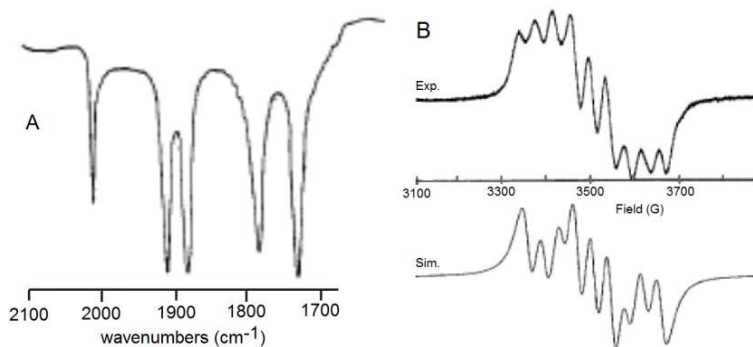

**Figure S3.** (A) IR spectrum and (B) X-band (9.862 GHz) EPR spectrum of the reaction mixture of  $[\{\text{Re}(\text{CO})_3\text{Cl}\}_2(\mu\text{-adcpip})]$  with 2 equivalents of  $\text{PPh}_3$  in THF. EPR spectrum recorded after 10 min, simulation with one  $A_{\text{Re}}$  of 41.8 G and one  $^{31}\text{P}$  ( $A_{\text{P}}$ ) of 115 G and 30 G linewidth (Lorentzian).

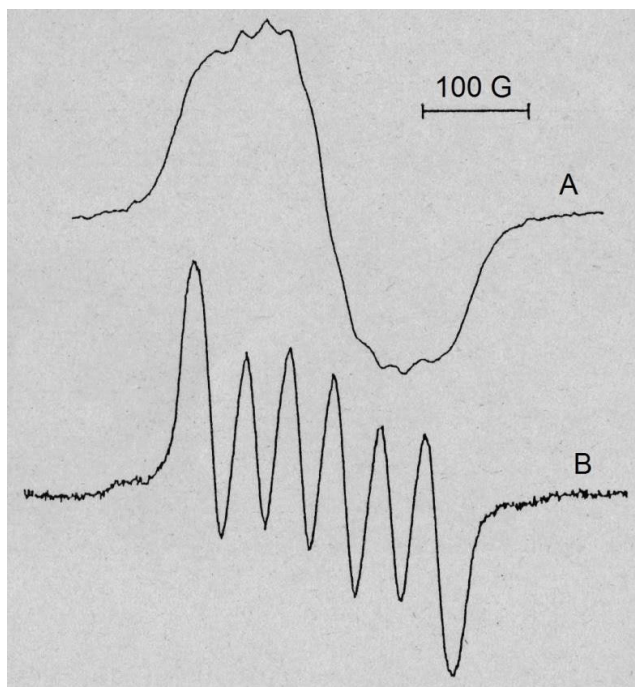

**Figure S4.** X-band EPR spectrum of the assumed  $[\{\text{Re}(\text{CO})_3\text{Cl}\}_2(\mu\text{-adcpip})]^\bullet-$  in toluene before (A) and after (B) addition of a small amount of MeCN, measured at 9.864 GHz and 4.0 modulation amplitude; simulation of (A), see Figure S1; simulation of (B) (not shown):  $A_{\text{Re}} = 42.7$  G, linewidth = 30 G and Lorentzian lines.

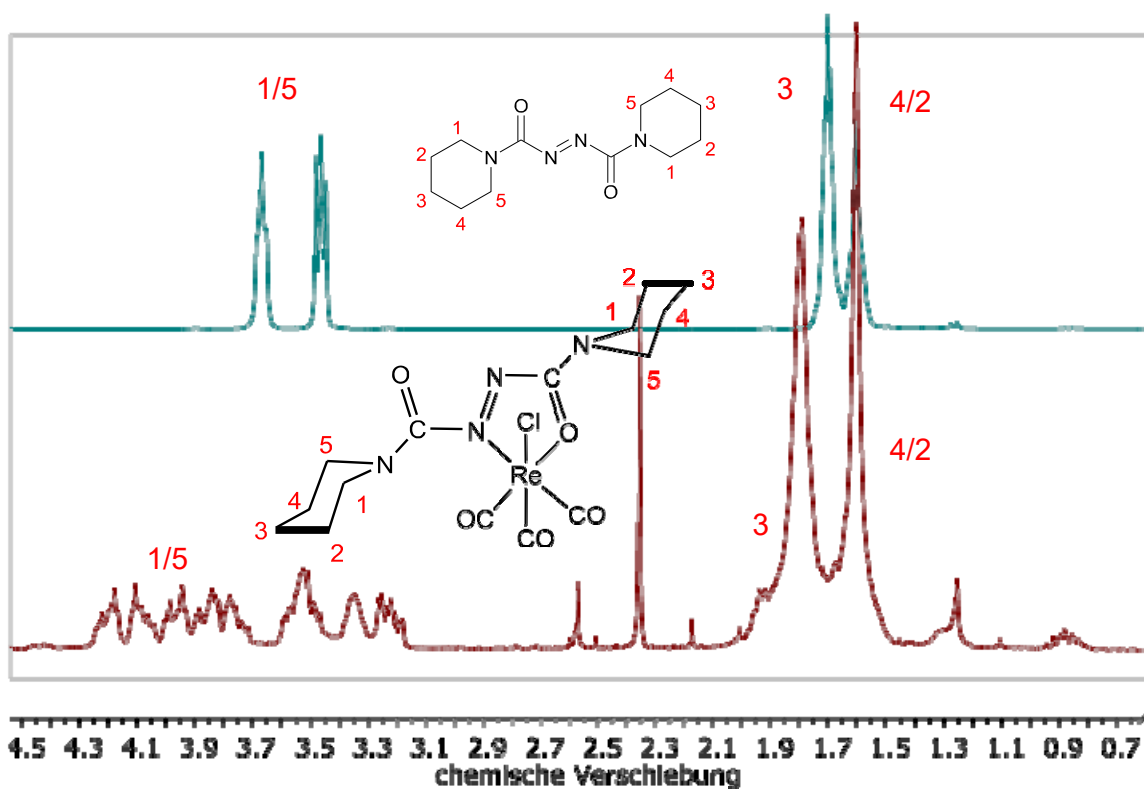

Figure S5. 300 MHz  $^1\text{H}$  NMR spectra of adcpip (top) and  $[\text{Re}(\text{CO})_3\text{Cl}(\text{adcpip})]$  (bottom) in  $\text{CDCl}_3$ .

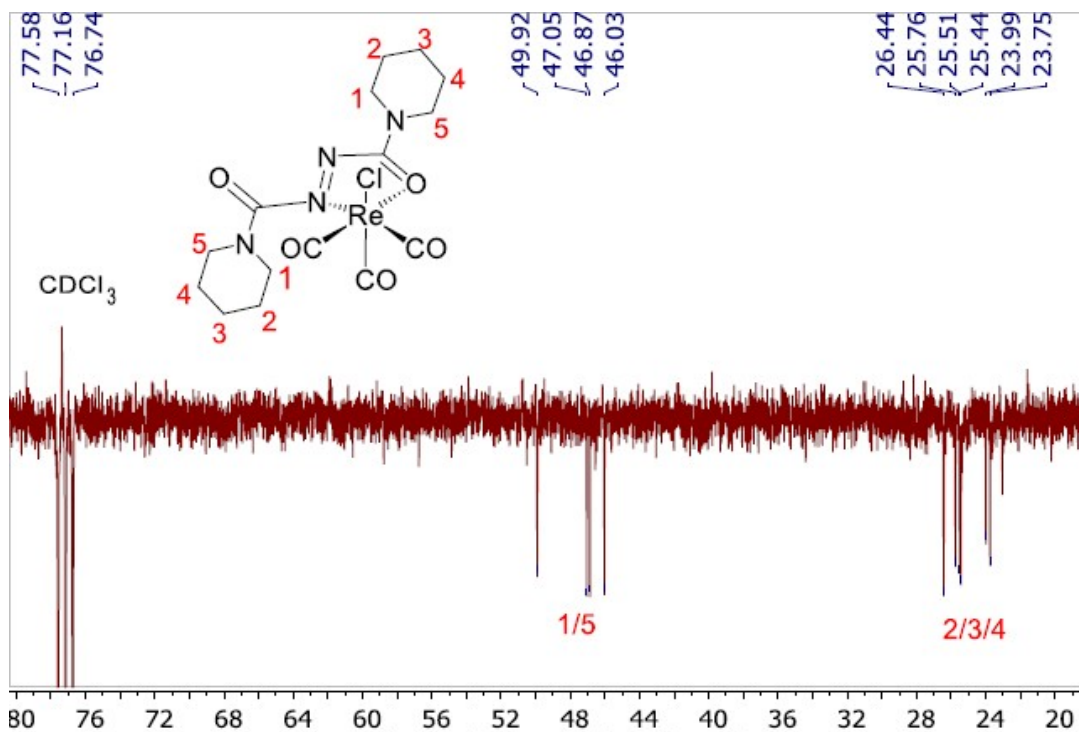

Figure S6. 75 MHz  $^{13}\text{C}$  DEPTQ NMR spectrum of  $[\text{Re}(\text{CO})_3\text{Cl}(\text{adcpip})]$  in  $\text{CDCl}_3$ .

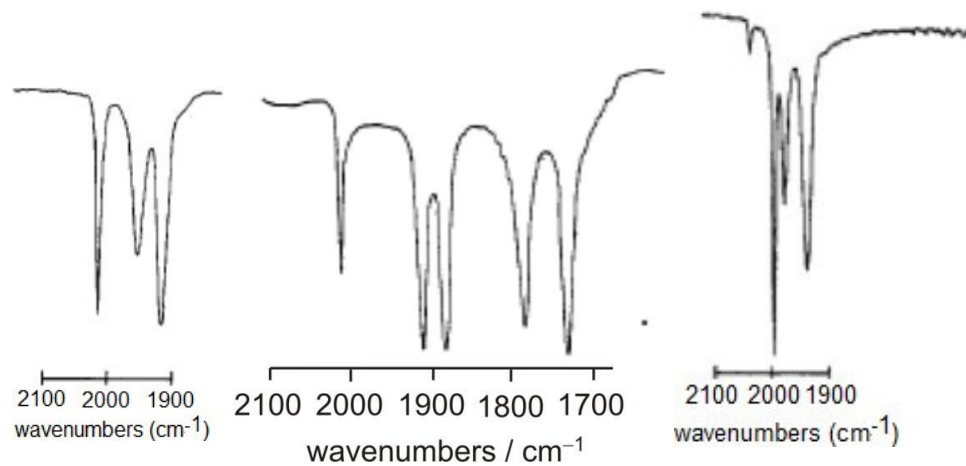

**Figure S7.** IR spectra of  $[\text{Re}(\text{CO})_3\text{Cl}(\text{adcpip})]$  (left),  $[\text{Re}(\text{CO})_3(\text{PPh}_3)(\text{adcpip})]\text{Cl}$  (middle), and  $[\text{Re}(\text{CO})_4(\mu\text{-Cl})_2\text{Re}(\text{CO})_4]$  (right) in  $\text{CH}_2\text{Cl}_2$  solution.

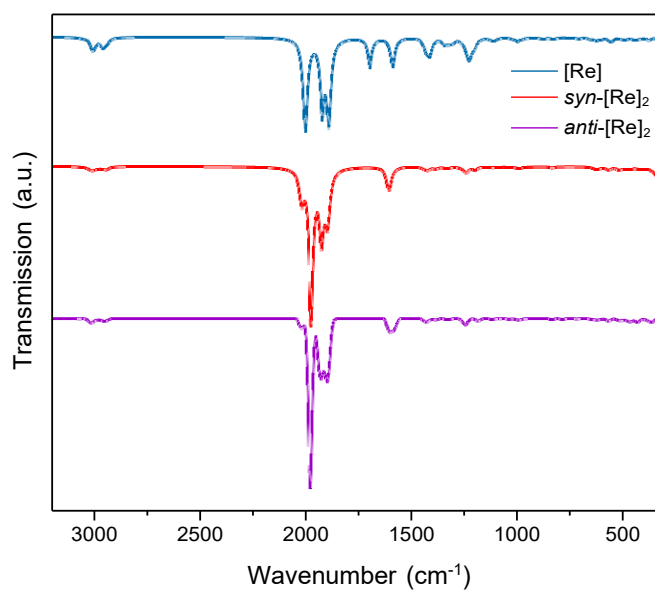

**Figure S8.** DFT-calculated IR spectra of  $[\text{Re}(\text{CO})_3\text{Cl}(\text{adcpip})]$   $[\text{Re}]$ , and  $[\{\text{Re}(\text{CO})_3\text{Cl}\}_2(\mu\text{-adcpip})]$  (*anti*- $[\text{Re}]_2$ , and *syn*- $[\text{Re}]_2$ ); TPSSh(def2-TZVP(+def2-ECP for Re))/(CPCMC(THF) level of theory.

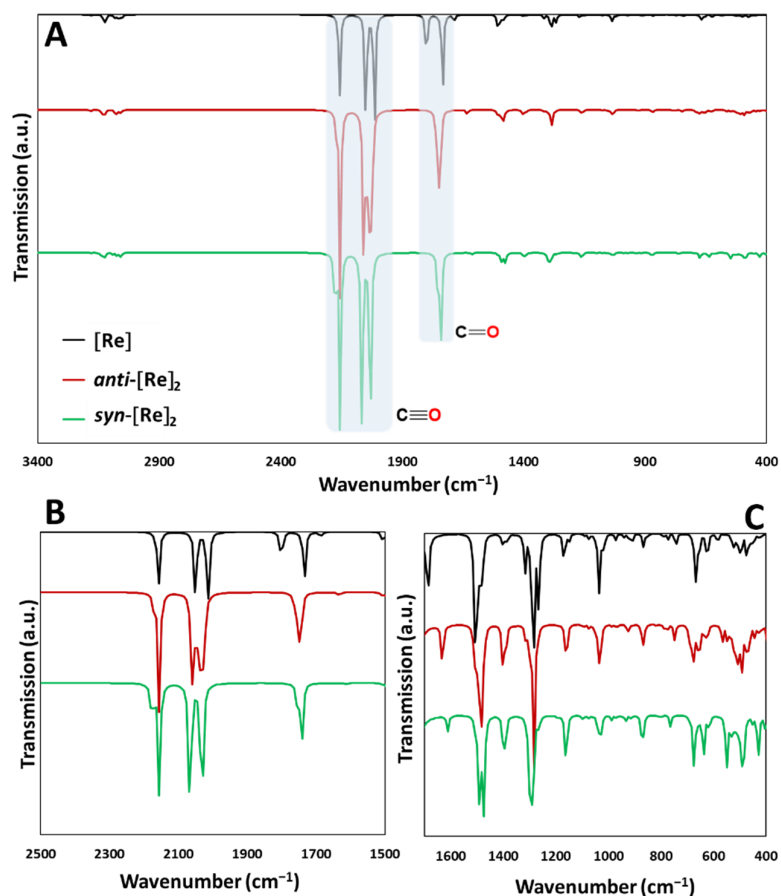

**Figure S9.** (A) DFT calculated IR spectra of [Re(CO)<sub>3</sub>Cl(adcip)] [Re], and [{Re(CO)<sub>3</sub>Cl}<sub>2</sub>(μ-adcip)] (*anti*-[Re]<sub>2</sub> and *syn*-[Re]<sub>2</sub>), solvent: THF, functional: M06-2X, basis set: def2TZVP for C, H, N, O, Cl and LANL2DZ for Re; (B,C) Magnified view (400-1700 cm<sup>-1</sup> and 1500-2500 cm<sup>-1</sup>) of the IR spectra of [Re], and *anti*-[Re]<sub>2</sub>, and *syn*-[Re]<sub>2</sub>.

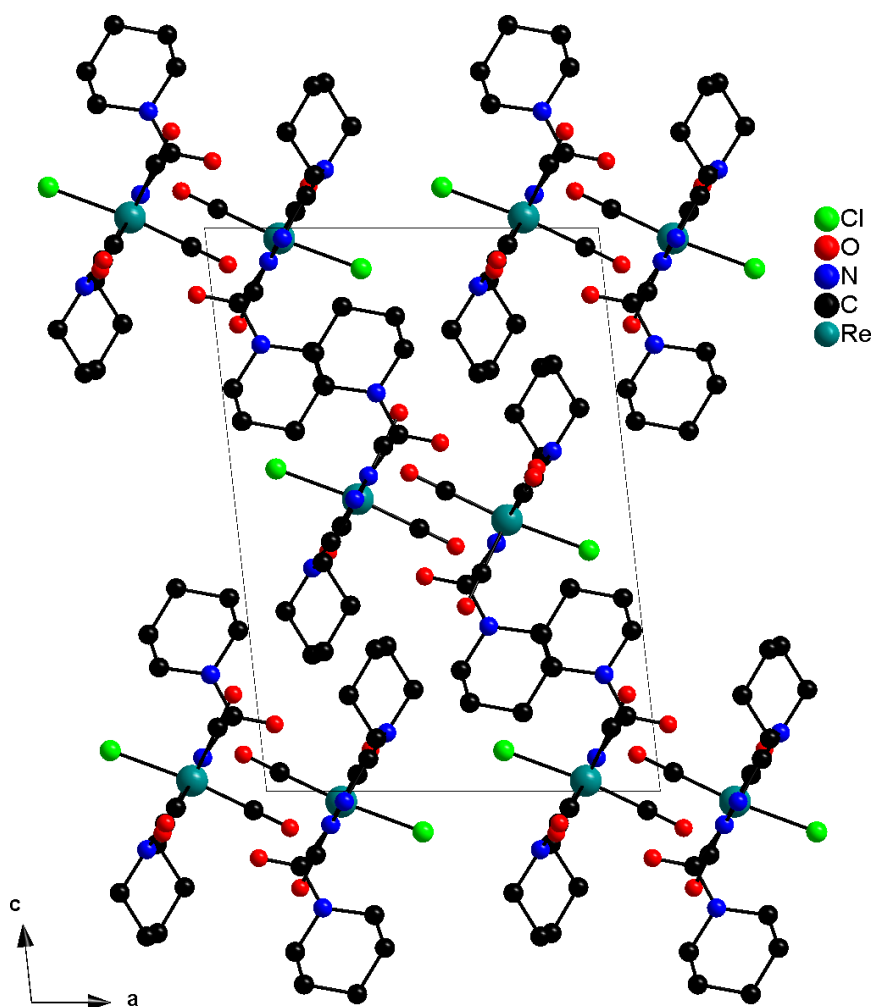

**Figure S10.** View on the crystal structure of  $[\text{Re}(\text{CO})_3\text{Cl}(\text{adcip})]$  along the crystallographic  $b$  axis.

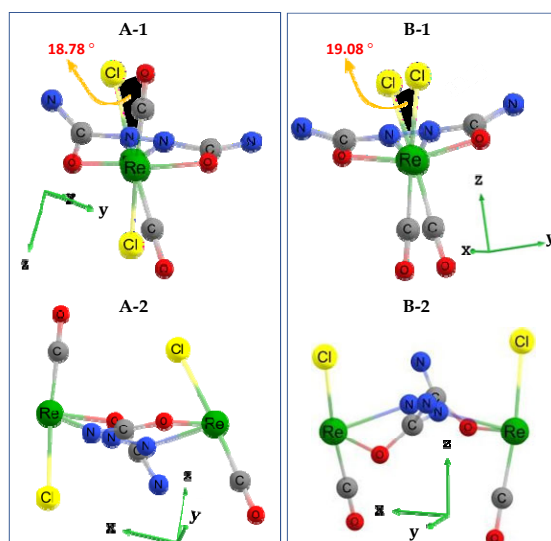

**Figure S11.** Views on the optimised structures in the  $S_0$  ground state for  $[[\text{Re}(\text{CO})_3\text{Cl}]_2(\mu\text{-adcip})]$  A: in *anti* configuration (*anti*- $[\text{Re}]_2$ ), and B: in *syn* configuration (*syn*- $[\text{Re}]_2$ ); M06-2X/def2TZVP/LANL2DZ/CPCM(THF) level of theory.



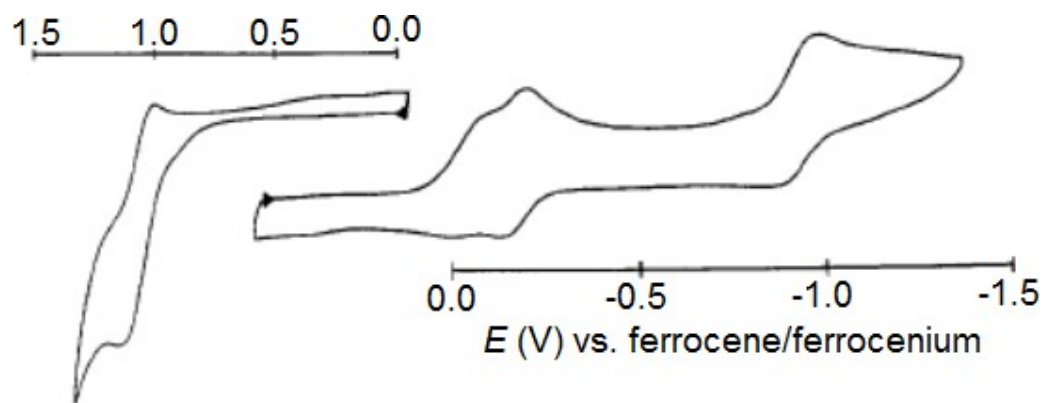

**Figure S12.** Cyclic voltammograms of  $[\text{Re}(\text{CO})_3\text{Cl}]_2(\text{adc-OEt})$  in 0.1 M  $n\text{-Bu}_4\text{NPF}_6/\text{DCE}$ .

23

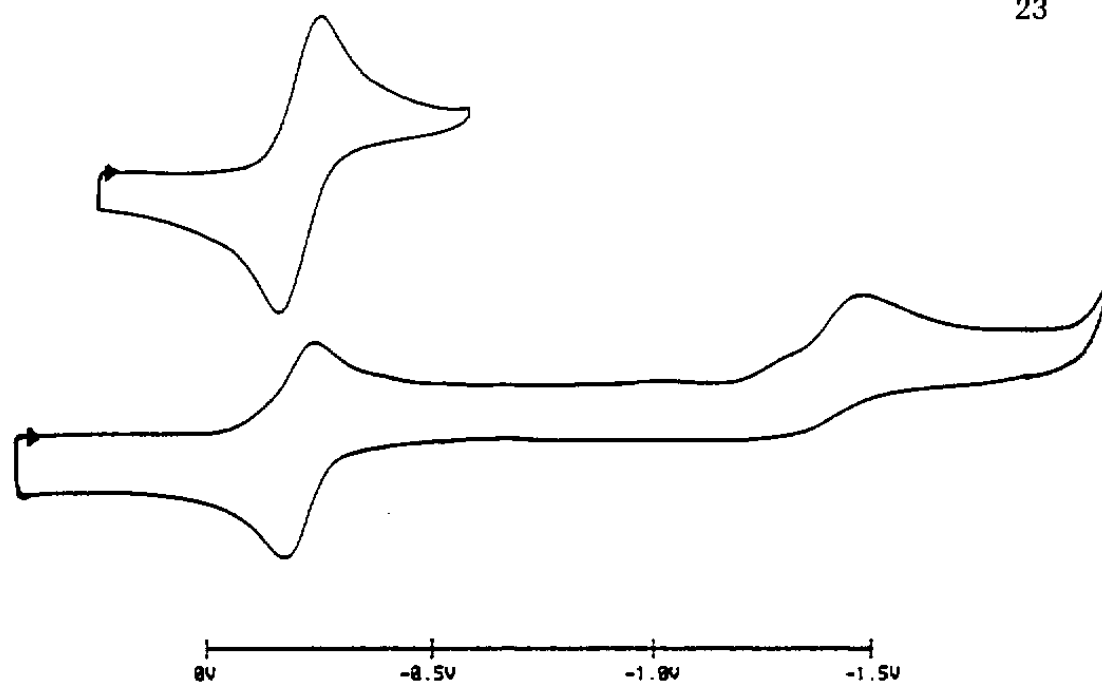

**Figure S13.** Cyclic voltammogram of  $[\text{Re}(\text{CO})_3\text{Cl}]_2(\mu\text{-adcpip})$  in  $n\text{-Bu}_4\text{NPF}_6/\text{DCE}$ .

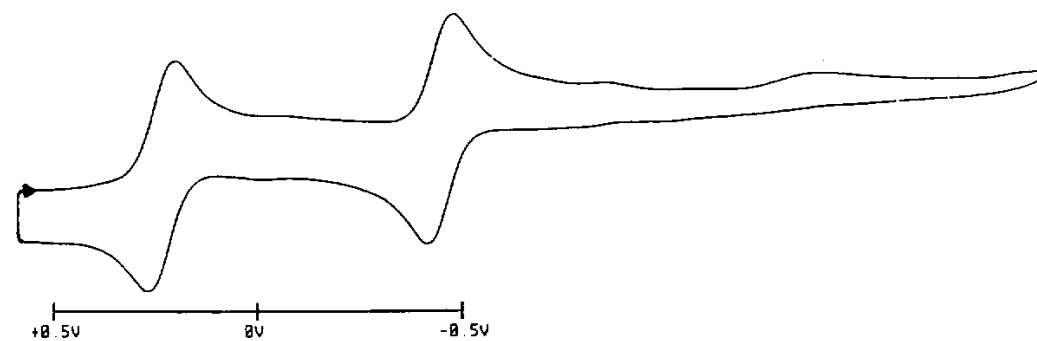

**Figure S14.** Cyclic voltammogram of  $[\text{Re}(\text{CO})_3(\text{PPh}_3)(\text{adcpip})]\text{Cl}$  in  $n\text{-Bu}_4\text{NPF}_6/\text{DCE}$ .

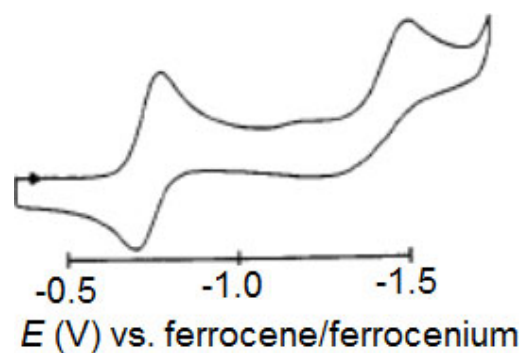

**Figure S15.** Cyclic voltammograms of  $[\text{Re}(\text{CO})_3\text{Cl}(\text{pacOEt})]$  in 0.1 M  $n\text{-Bu}_4\text{NPF}_6/\text{DCE}$ .

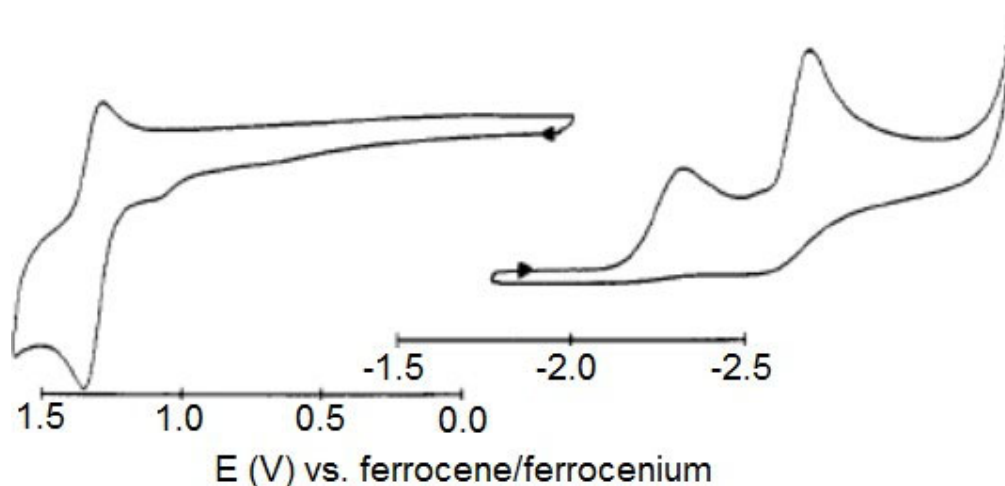

**Figure S16.** Cyclic voltammograms of  $[\text{Re}_2(\mu\text{-Cl})_2(\text{CO})_8]$  in 0.1 M  $n\text{-Bu}_4\text{NPF}_6/\text{DCE}$ .

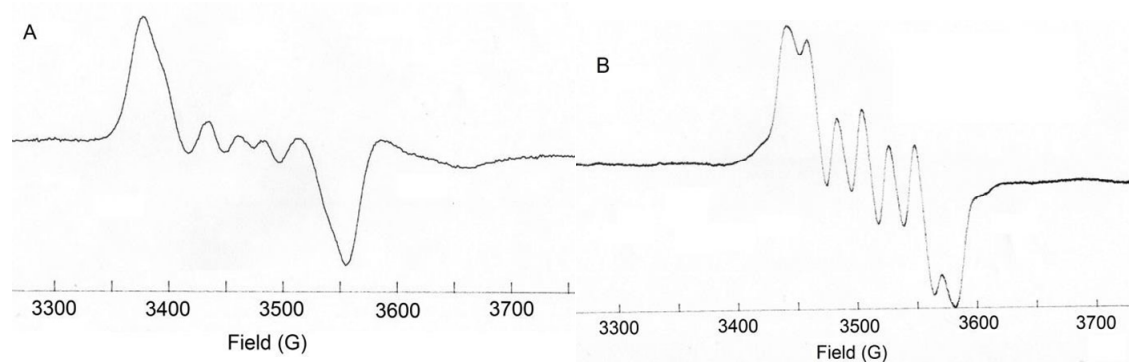

**Figure S17.** X-band EPR spectrum of the assumed  $[\text{Re}(\text{CO})_3(\text{CH}_2\text{Cl}_2)(\text{adcip})]^\bullet$  (A) generated from  $[\{\text{Re}(\text{CO})_3\text{Cl}_2(\mu\text{-adcip})\}]$  and  $\text{CoCp}_2$  in  $\text{CH}_2\text{Cl}_2$  in solution at 298 K. Simulation using  $A_{\text{Re}} = 22$  G, linewidth = 15 G and Lorentzian lines (not shown). (B) EPR spectrum of the assumed  $[\text{Re}(\text{CO})_3(\text{NEt}_3)(\text{adcip})]^\bullet$  in  $\text{CH}_2\text{Cl}_2$  at 298 K, obtained from  $[\{\text{Re}(\text{CO})_3\text{Cl}_2(\mu\text{-adcip})\}]$  after reaction with a small amount of  $\text{NEt}_3$ . Simulation using  $A_{\text{Re}} = 23.3$  G, linewidth = 15 G and Lorentzian lines (not shown).

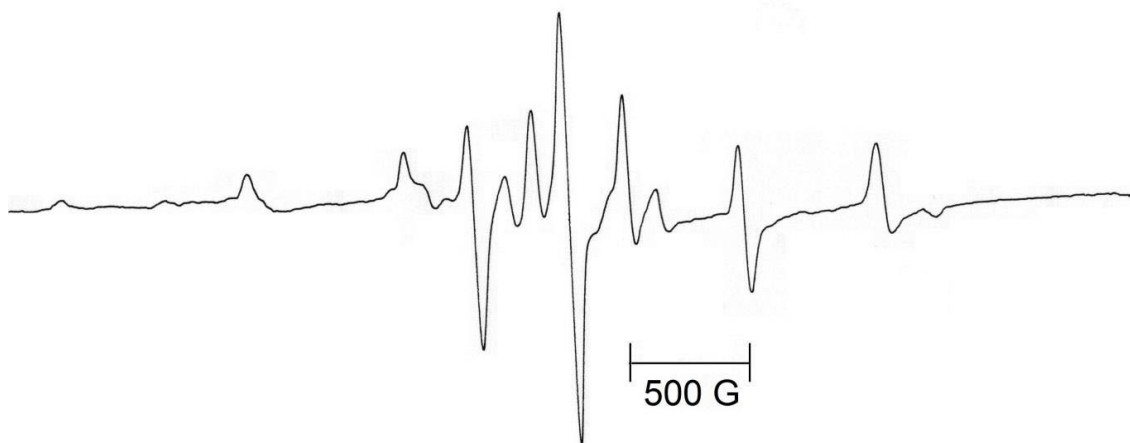

**Figure S18.** X-band EPR spectra of the assumed  $[\text{Re}(\text{CO})_3\text{Cl}(\text{adcOEt})]^+\bullet$  in glassy frozen acetone matrix at 4 K.

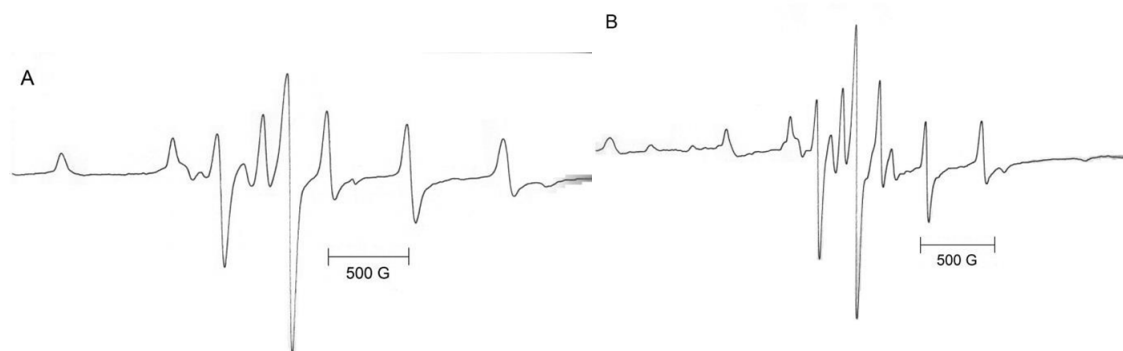

**Figure S19.** X-band EPR spectra of the assumed  $[\text{Re}(\text{CO})_3\text{Cl}(\text{adcOEt})]^+\bullet$  (A) and  $[\text{Re}(\text{CO})_3\text{Cl}(\text{adcO}i\text{Pr})]^+\bullet$  (B) in glassy frozen acetone matrix 4 K.

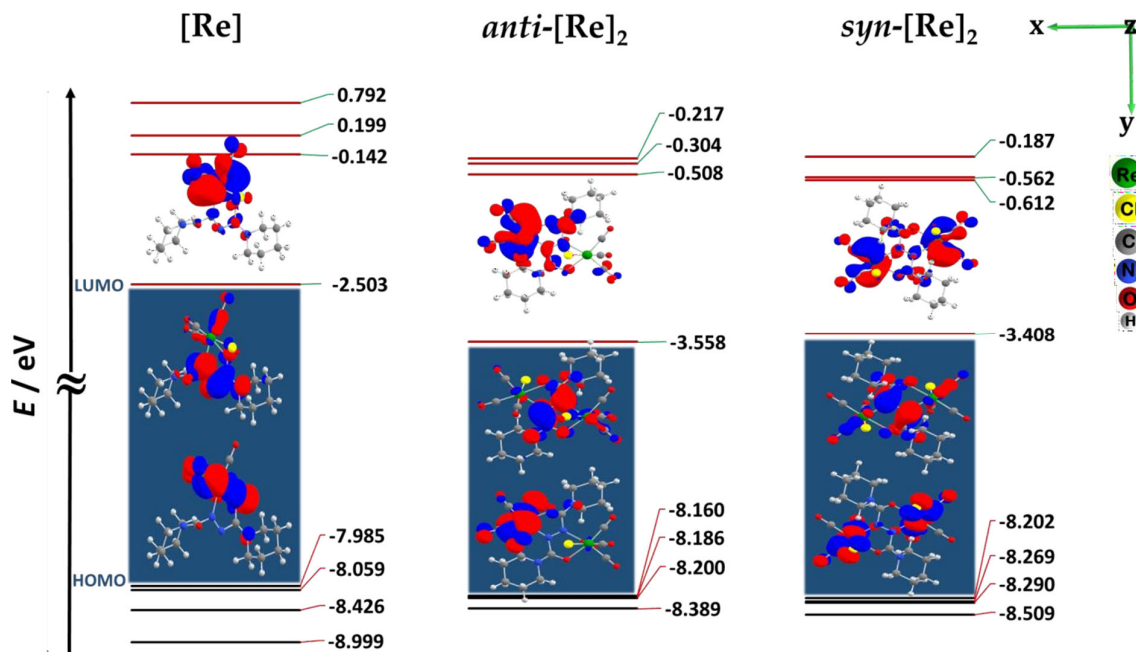

**Figure S20.** DFT-calculated energies of occupied MOs (blue) and unoccupied MOs (red) for the Re complexes  $[\text{Re}]$ ,  $\text{anti-}[\text{Re}]_2$  and  $\text{syn-}[\text{Re}]_2$ ; M06-2X/def2TZVP/LANL2DZ for Re/CPCM(THF) level of theory.

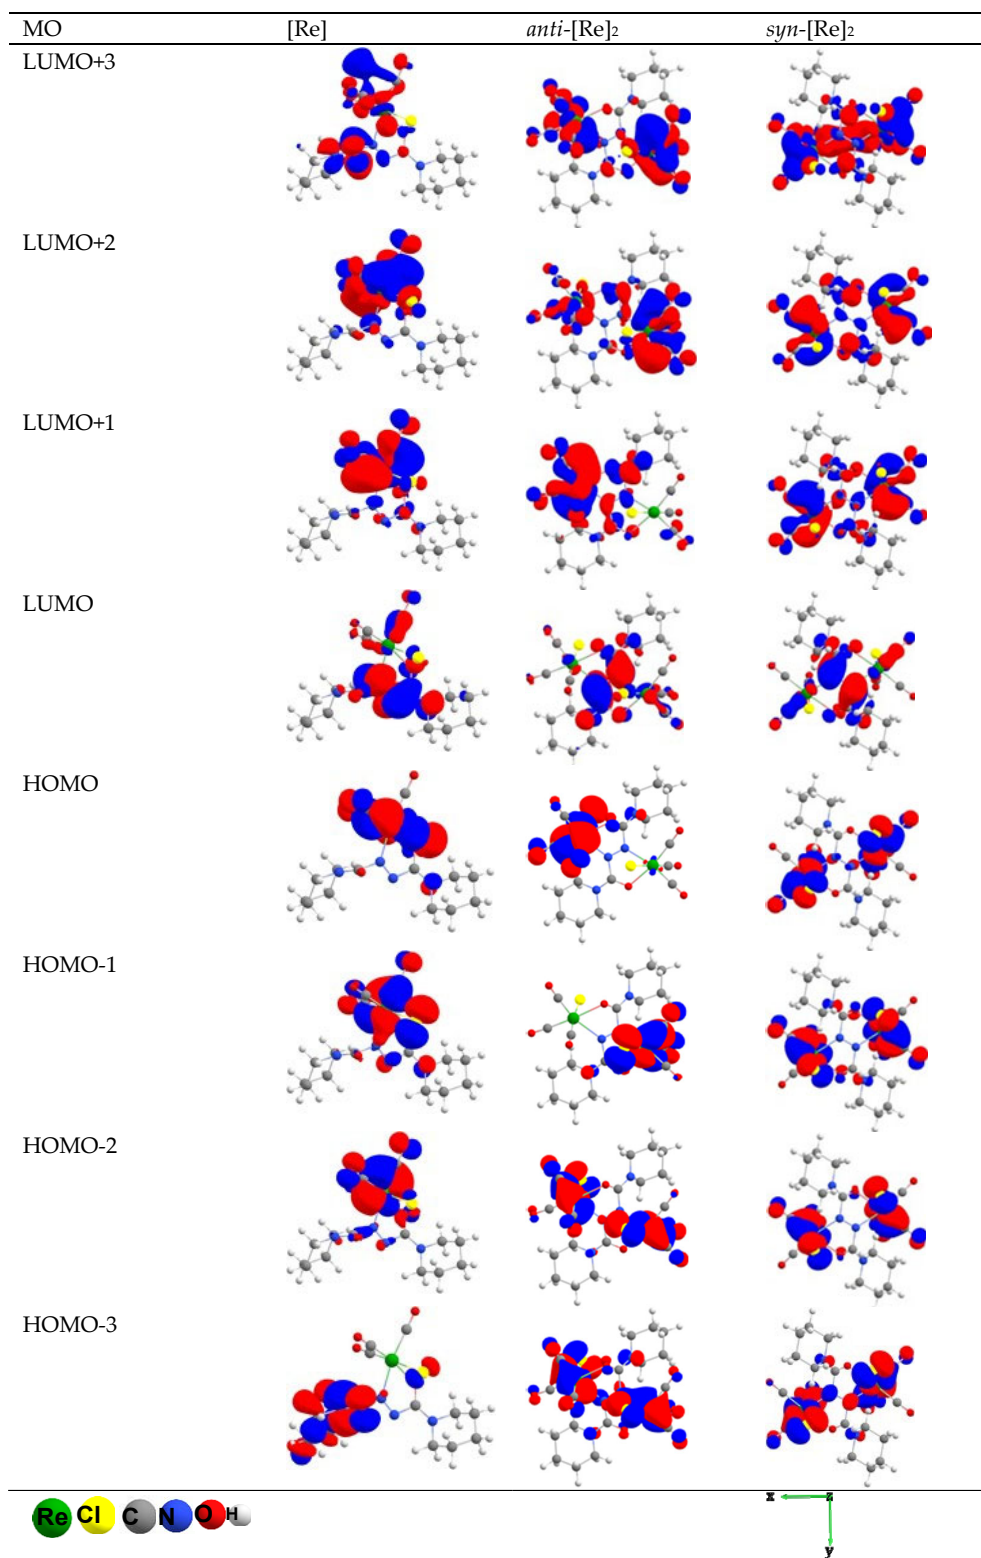

**Figure S21.** Frontier orbital landscape in the ground state ( $S_0$ ) for [Re(CO)<sub>3</sub>Cl(adcpip)] [Re], and [{Re(CO)<sub>3</sub>Cl}(μ-adcpip)] (*anti*-[Re]<sub>2</sub> and *syn*-[Re]<sub>2</sub>); M062X/def2TZVP/LANL2DZ for Re/CPCM(THF) level of theory.

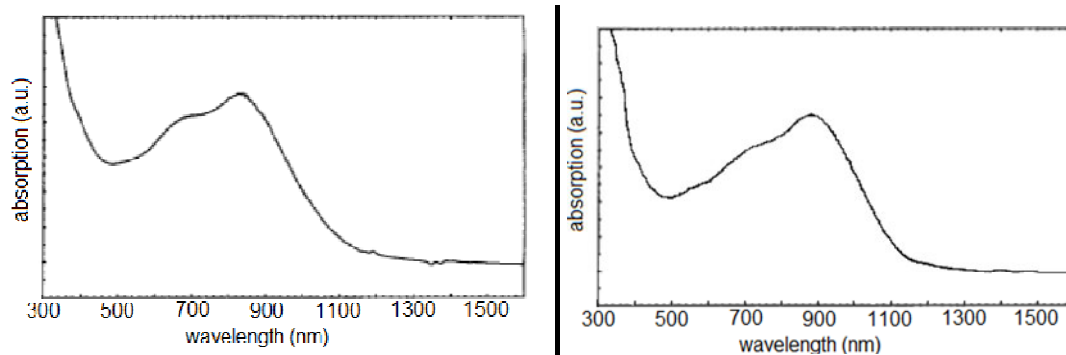

**Figure S22.** UV-vis-NIR absorption spectrum of  $[\text{Re}(\text{CO})_3\text{Cl}]_2(\text{OiPr})$  (left) and  $[\text{Re}(\text{CO})_3\text{Cl}]_2(\mu\text{-adcOEt})$  (right) in  $\text{CH}_2\text{Cl}_2$ .

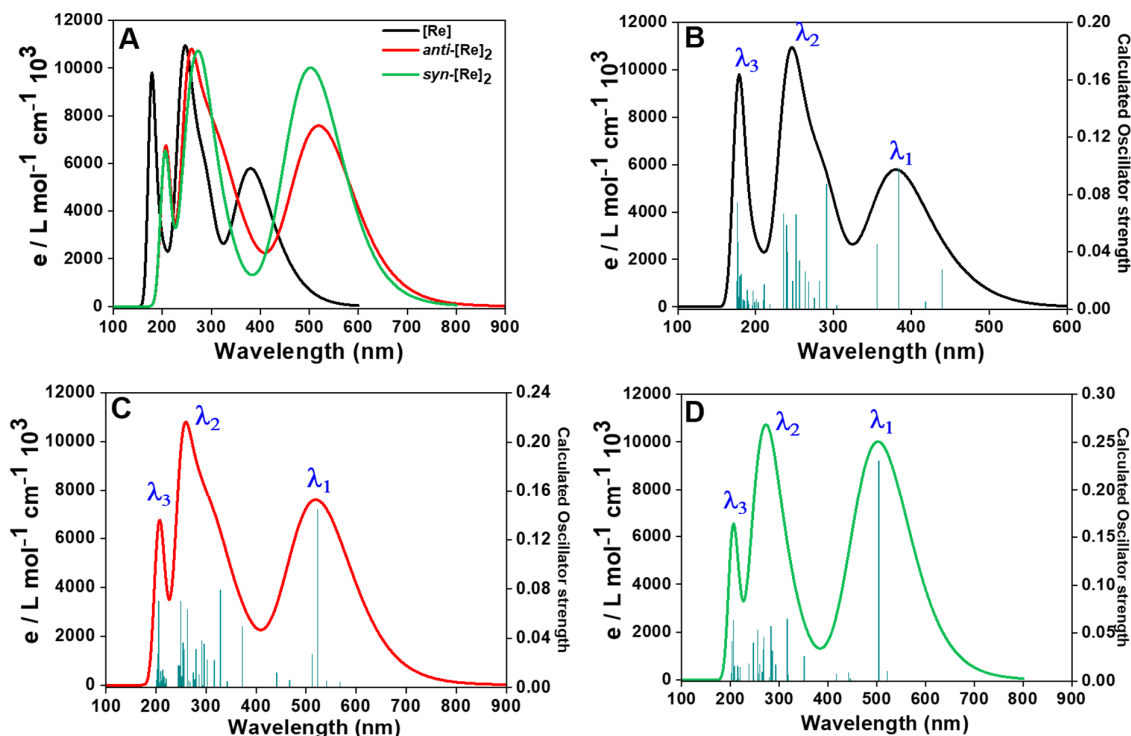

**Figure S23.** TD-DFT-calculated UV-vis absorption spectra **A:** Overlay spectra of  $[\text{Re}]$ ,  $\text{anti-}[\text{Re}]_2$ , and  $\text{syn-}[\text{Re}]_2$ ; **B:**  $[\text{Re}]$ ; **C:**  $\text{anti-}[\text{Re}]_2$ ; **D:**  $\text{syn-}[\text{Re}]_2$ ; M06-2X/def2-TZVP/LANL2DZ for  $\text{Re}/\text{CPCM}(\text{THF})$  level of theory.

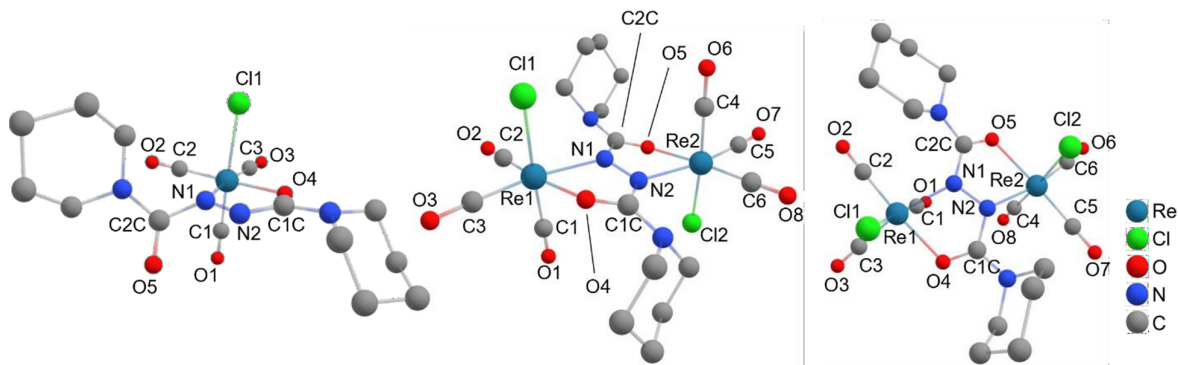

**Figure S24.** DFT-optimised structures in the  $D_0$  ground state for  $[\text{Re}]^{+}$ ,  $\text{anti-}[\text{Re}]_2^{+}$ , and  $\text{syn-}[\text{Re}]_2^{+}$ ; H atoms omitted for clarity; BP86/def2-TZVP(+def2-ECP for Re)/CPCMC(THF) level of theory.

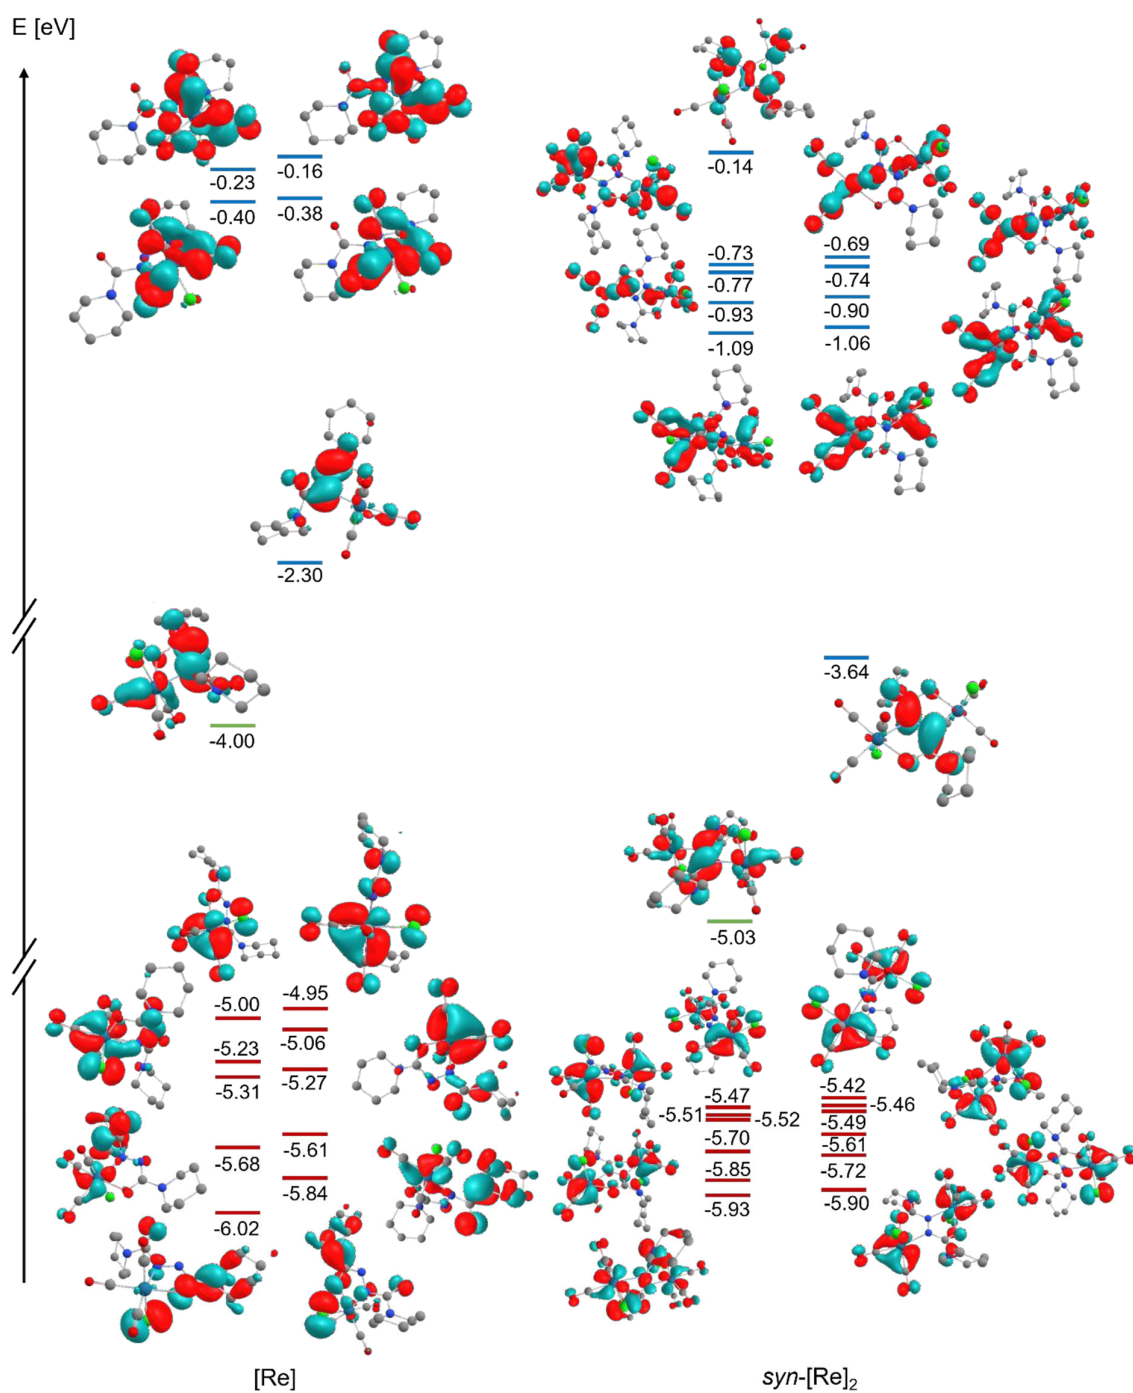

**Figure S25.** DFT-calculated frontier orbital landscape in the ground state ( $D_0$ ) for  $[\text{Re}]^+$  and  $\text{anti-}[\text{Re}]_2^+$ ; TPSSH/def2-TZVP(+def2-ECP for Re)/CPCMC(THF) level of theory.

## Supporting Tables

**Table S1.** Crystal Structure and solution data of [Re(CO)<sub>3</sub>Cl(adcpip)].

|                                                                             |                                                                             |             |
|-----------------------------------------------------------------------------|-----------------------------------------------------------------------------|-------------|
|                                                                             | [Re(CO) <sub>3</sub> Cl(adcpip)]                                            |             |
| Formula / Formula weight (g/mol)                                            | C <sub>15</sub> H <sub>20</sub> ClN <sub>4</sub> O <sub>5</sub> Re / 558.00 |             |
| Temperature (K) / Wavelength                                                | 100(2) / Mo K $\alpha$ ( $\lambda$ = 0.71073 Å)                             |             |
| Crystal system / Space group                                                | monoclinic / <i>P</i> 2 <sub>1</sub> / <i>n</i>                             |             |
| Unit cell                                                                   | a (Å)                                                                       | 11.0824(7)  |
|                                                                             | b (Å)                                                                       | 10.8130(7)  |
|                                                                             | c (Å)                                                                       | 15.9619(10) |
|                                                                             | $\beta$ (°)                                                                 | 96.288(2)   |
| Volume (Å <sup>3</sup> ) / Z                                                | 1901.3(2) / 4                                                               |             |
| Calculated density (g cm <sup>-3</sup> )                                    | 1.949                                                                       |             |
| Absorption coefficient (cm <sup>-1</sup> )                                  | 6.57                                                                        |             |
| <i>F</i> (000)                                                              | 1080                                                                        |             |
| Crystal colour/shape                                                        | purple needle                                                               |             |
| Measurement device type                                                     | Bruker D8 Venture                                                           |             |
| Theta range for data collection (°)                                         | 2.3 to 33.1                                                                 |             |
| Index ranges                                                                | -11 ≤ <i>h</i> ≤ 11, -26 ≤ <i>k</i> ≤ 25, -27 ≤ <i>l</i> ≤ 27               |             |
| Reflections collected                                                       | 144888                                                                      |             |
| Independent reflections                                                     | total/ <i>I</i> > 2σ( <i>I</i> )                                            | 7262/5642   |
| Completeness to theta                                                       | 100%                                                                        |             |
| Data / restraints / parameters                                              | 7262/0/235                                                                  |             |
| <i>R</i> <sub>int</sub>                                                     | 0.1032                                                                      |             |
| <i>R</i> <sub>σ</sub>                                                       | 0.0315                                                                      |             |
| Goodness-of-fit on <i>F</i> <sup>2</sup>                                    | 1.10                                                                        |             |
| <i>R</i> <sub>1</sub> / <i>wR</i> <sub>2</sub> ( <i>I</i> > 2σ( <i>I</i> )) | 0.0226/0.0508                                                               |             |
| <i>R</i> <sub>1</sub> / <i>wR</i> <sub>2</sub> (all data)                   | 0.0307/0.0508                                                               |             |
| Largest diff. peak and hole (e Å <sup>-1</sup> )                            | 1.19/-2.33                                                                  |             |
| CCDC                                                                        | 2194078                                                                     |             |

**Table S2.** Selected metrics from the crystal structure of [Re(CO)<sub>3</sub>Cl(adcpip)].

| Bond lengths (Å) |          | Angles (°) |          |
|------------------|----------|------------|----------|
| Re1-Cl1          | 2.457(1) | Cl1-Re1-C1 | 174.5(1) |
| Re1-C1           | 1.924(2) | Cl1-Re1-C2 | 95.6(1)  |
| Re1-C2           | 1.897(2) | Cl1-Re1-C3 | 87.0(1)  |
| Re1-C3           | 1.942(2) | Cl1-Re1-O4 | 81.6(1)  |
| Re1-O4           | 2.151(1) | Cl1-Re1-N1 | 89.6(1)  |
| Re1-N1           | 2.117(2) | O4-Re1-N1  | 71.6(1)  |
| N1-N2            | 1.261(2) | O4-Re1-C1  | 95.2(1)  |
| C1C-O4           | 1.257(3) | O4-Re1-C2  | 170.2(1) |
| C2C-O5           | 1.211(3) | O4-Re1-C3  | 100.9(1) |
| N1-C2C           | 1.489(2) | C1-Re1-C2  | 88.3(1)  |
| N2-C1C           | 1.443(2) | C1-Re1-C3  | 89.2(1)  |
| C1-O1            | 1.148(3) | C1-Re1-N1  | 93.7(1)  |
| C2-O2            | 1.156(3) | C2-Re1-C3  | 88.3(1)  |
| C3-O3            | 1.145(3) | C2-Re1-N1  | 99.0(1)  |
| C1C-N3           | 1.317(3) | C3-Re1-N1  | 172.2(1) |
| C2C-N4           | 1.330(3) | N2-N1-Re1  | 123.1(1) |
|                  |          | N4-C2C-N1  | 115.1(2) |



|                     |          |              |          |
|---------------------|----------|--------------|----------|
|                     |          | N3-C1C-N2    | 115.1(2) |
| Dihedral angles (°) |          |              |          |
| Re1-O4-C1C-N2       | 3.3(2)   | N1-N2-C1C-N3 | 176.5(2) |
| Re1-N1-N2-C1C       | 0.9(2)   | N2-N1-C2C-N4 | 99.8(2)  |
| C2C-N1-N2-C1C       | 172.9(2) |              |          |

**Table S3A.** Selected DFT-calculated metrics of [Re], *anti*-[Re]<sub>2</sub> and *syn*-[Re]<sub>2</sub>, in comparison with those of [Re]<sup>••</sup>, *anti*-[Re]<sub>2</sub><sup>••</sup> and *syn*-[Re]<sub>2</sub><sup>••</sup>; at BP86/def2-TZVP(+def2-ECP for Re)/CPCMC(THF) level of theory.

| Bond length (Å) | [Re]  | [Re] <sup>••</sup> | Δ <sup>a</sup> | <i>anti</i> -[Re] | <i>anti</i> -[Re] <sub>2</sub> <sup>••</sup> | Δ <sup>a</sup> | <i>syn</i> -[Re] <sub>2</sub> | <i>syn</i> -[Re] <sub>2</sub> <sup>••</sup> | Δ <sup>a</sup> |
|-----------------|-------|--------------------|----------------|-------------------|----------------------------------------------|----------------|-------------------------------|---------------------------------------------|----------------|
| Re1-Cl1         | 2.473 | 2.532              | +0.059         | 2.456             | 2.532                                        | +0.076         | 2.446                         | 2.522                                       | +0.076         |
| Re1-C1          | 1.933 | 1.906              | -0.027         | 1.937             | 1.912                                        | -0.025         | 1.937                         | 1.915                                       | -0.022         |
| Re1-C2          | 1.912 | 1.909              | -0.003         | 1.911             | 1.903                                        | -0.008         | 1.907                         | 1.898                                       | -0.009         |
| Re1-C3          | 1.969 | 1.932              | -0.037         | 1.947             | 1.911                                        | -0.036         | 1.951                         | 1.916                                       | -0.035         |
| Re1-O4          | 2.169 | 2.149              | -0.020         | 2.183             | 2.230                                        | +0.047         | 2.191                         | 2.271                                       | +0.080         |
| Re1-N1          | 2.078 | 2.159              | +0.081         | 2.145             | 2.322                                        | +0.177         | 2.131                         | 2.273                                       | +0.142         |
| Re2-Cl2         | -     | -                  | -              | 2.466             | 2.532                                        | +0.066         | 2.449                         | 2.524                                       | +0.075         |
| Re2-C4          | -     | -                  | -              | 1.932             | 1.912                                        | -0.020         | 1.936                         | 1.915                                       | -0.021         |
| Re2-C5          | -     | -                  | -              | 1.911             | 1.903                                        | -0.008         | 1.907                         | 1.897                                       | -0.010         |
| Re2-C6          | -     | -                  | -              | 1.949             | 1.911                                        | -0.038         | 1.950                         | 1.918                                       | -0.032         |
| Re2-O5          | -     | -                  | -              | 2.162             | 2.230                                        | +0.068         | 2.202                         | 2.282                                       | +0.080         |
| Re2-N2          | -     | -                  | -              | 2.135             | 2.321                                        | +0.186         | 2.134                         | 2.262                                       | +0.128         |
| N1-N2           | 1.283 | 1.344              | +0.061         | 1.325             | 1.362                                        | +0.037         | 1.321                         | 1.355                                       | +0.034         |
| C1C-O4          | 1.275 | 1.293              | +0.018         | 1.268             | 1.276                                        | +0.008         | 1.266                         | 1.273                                       | +0.007         |
| C2C-O5          | 1.227 | 1.239              | +0.012         | 1.266             | 1.276                                        | +0.010         | 1.266                         | 1.272                                       | +0.006         |
| N1-C2C          | 1.484 | 1.432              | -0.052         | 1.421             | 1.388                                        | -0.033         | 1.434                         | 1.395                                       | -0.039         |
| N2-C1C          | 1.414 | 1.360              | -0.054         | 1.428             | 1.388                                        | -0.040         | 1.428                         | 1.394                                       | -0.034         |
| C1=O1           | 1.164 | 1.174              | +0.010         | 1.161             | 1.170                                        | +0.009         | 1.163                         | 1.169                                       | +0.006         |
| C2=O2           | 1.167 | 1.174              | +0.007         | 1.165             | 1.171                                        | +0.006         | 1.166                         | 1.172                                       | +0.006         |
| C3=O3           | 1.157 | 1.170              | +0.013         | 1.157             | 1.168                                        | +0.011         | 1.157                         | 1.168                                       | +0.011         |
| C4=O6           | -     | -                  | -              | 1.166             | 1.170                                        | +0.004         | 1.163                         | 1.169                                       | +0.006         |
| C5=O7           | -     | -                  | -              | 1.166             | 1.171                                        | +0.005         | 1.166                         | 1.171                                       | +0.005         |
| C6=O8           | -     | -                  | -              | 1.157             | 1.168                                        | +0.011         | 1.157                         | 1.168                                       | +0.011         |
| Re1-Re2         | -     | -                  | -              | 4.812             | 5.354                                        | +0.542         | 4.766                         | 4.982                                       | +0.216         |
| Angles (°)      |       |                    |                |                   |                                              |                |                               |                                             |                |
| Cl1-Re1-C1      | 177.4 | 177.7              | +0.3           | 179.6             | 174.7                                        | -4.9           | 177.7                         | 175.8                                       | -1.9           |
| Cl1-Re1-C2      | 93.6  | 94.1               | +0.5           | 94.2              | 97.4                                         | +3.2           | 95.2                          | 96.3                                        | +1.1           |
| Cl1-Re1-C3      | 88.6  | 91.4               | +2.8           | 93.1              | 90.9                                         | -2.2           | 92.9                          | 93.6                                        | +0.7           |
| Cl1-Re1-O4      | 81.9  | 82.3               | +0.4           | 82.5              | 82.4                                         | -0.1           | 82.7                          | 82.2                                        | -0.5           |
| Cl1-Re1-N1      | 90.0  | 86.9               | -3.1           | 89.2              | 90.6                                         | +1.4           | 90.5                          | 86.6                                        | -3.9           |
| O4-Re1-N1       | 72.1  | 73.0               | +0.9           | 73.1              | 69.2                                         | -3.9           | 73.3                          | 70.7                                        | -2.6           |
| O4-Re1-C1       | 96.9  | 95.4               | -1.5           | 97.5              | 92.3                                         | -5.2           | 95.0                          | 94.2                                        | -0.8           |
| O4-Re1-C2       | 169.4 | 172.4              | +3.0           | 176.2             | 173.3                                        | -2.9           | 175.8                         | 174.8                                       | -1.0           |
| O4-Re1-C3       | 98.5  | 97.5               | -1.0           | 93.1              | 99.4                                         | +6.3           | 95.1                          | 97.7                                        | +2.6           |
| C1-Re1-C2       | 87.9  | 88.2               | +0.3           | 85.8              | 87.9                                         | +2.1           | 87.0                          | 87.1                                        | +0.1           |
| C1-Re1-C3       | 91.0  | 89.4               | -1.6           | 87.3              | 89.6                                         | +2.3           | 87.7                          | 89.1                                        | +1.4           |
| C1-Re1-N1       | 91.8  | 92.0               | +0.2           | 90.4              | 87.8                                         | -2.6           | 88.5                          | 90.1                                        | +1.6           |
| C2-Re1-C3       | 91.0  | 89.2               | -1.8           | 89.0              | 87.3                                         | -1.7           | 88.6                          | 87.4                                        | -1.2           |
| C2-Re1-N1       | 98.3  | 100.3              | +2.0           | 105.0             | 104.1                                        | -0.9           | 103.2                         | 104.3                                       | +1.1           |
| C3-Re1-N1       | 170.7 | 170.5              | -0.2           | 165.5             | 168.2                                        | +2.7           | 167.3                         | 168.2                                       | +0.9           |
| Cl2-Re2-C4      | -     | -                  | -              | 176.3             | 174.7                                        | -1.6           | 177.7                         | 176.0                                       | -1.7           |
| Cl2-Re2-C5      | -     | -                  | -              | 90.7              | 97.4                                         | +6.7           | 94.6                          | 95.0                                        | +0.4           |
| Cl2-Re2-C6      | -     | -                  | -              | 87.2              | 90.9                                         | +3.7           | 93.3                          | 93.9                                        | +0.6           |
| Cl2-Re2-O5      | -     | -                  | -              | 85.4              | 82.4                                         | -3.0           | 82.3                          | 81.6                                        | -0.7           |
| Cl2-Re2-N2      | -     | -                  | -              | 84.6              | 89.9                                         | +5.3           | 89.5                          | 86.0                                        | -3.5           |
| O5-Re2-N2       | -     | -                  | -              | 72.3              | 69.2                                         | -3.1           | 73.2                          | 71.0                                        | -2.2           |
| O5-Re2-C4       | -     | -                  | -              | 94.7              | 92.3                                         | -2.4           | 95.5                          | 95.3                                        | -0.2           |



|                     |       |       |      |        |        |       |        |        |       |
|---------------------|-------|-------|------|--------|--------|-------|--------|--------|-------|
| O5-Re2-C5           | -     | -     | -    | 172.0  | 173.3  | +1.3  | 174.4  | 173.2  | -1.2  |
| O5-Re2-C6           | -     | -     | -    | 97.6   | 99.4   | +1.8  | 95.3   | 98.0   | +2.7  |
| C4-Re2-C5           | -     | -     | -    | 89.7   | 87.9   | -1.8  | 87.5   | 87.8   | +0.3  |
| C4-Re2-C6           | -     | -     | -    | 89.1   | 89.6   | +0.5  | 87.7   | 89.0   | +1.3  |
| C4-Re2-N2           | -     | -     | -    | 99.0   | 88.5   | -10.5 | 89.0   | 90.7   | +1.7  |
| C5-Re2-C6           | -     | -     | -    | 89.1   | 87.3   | -1.8  | 89.5   | 88.1   | -1.4  |
| C5-Re2-N2           | -     | -     | -    | 100.4  | 104.1  | +3.7  | 102.1  | 103.0  | +0.9  |
| C6-Re2-N2           | -     | -     | -    | 167.5  | 168.4  | +0.9  | 167.8  | 168.9  | +1.1  |
| N2-N1-Re1           | 122.7 | 118.2 | -4.5 | 116.8  | 114.5  | -2.3  | 117.4  | 115.8  | -1.6  |
| N1-N2-Re2           | -     | -     | -    | 117.6  | 114.5  | -3.1  | 117.2  | 116.2  | -1.0  |
| N-C2C-N1            | 114.7 | 117.6 | +2.9 | 118.7  | 119.3  | +0.6  | 117.7  | 117.2  | -0.5  |
| N-C1C-N2            | 116.4 | 114.7 | -1.7 | 118.0  | 119.3  | +1.3  | 118.1  | 117.4  | -0.7  |
| Dihedral angles (°) |       |       |      |        |        |       |        |        |       |
| Re1-O1-C-N2         | 15.4  | 7.7   | -7.7 | 39.3   | 27.4   | -11.9 | -30.4  | -17.0  | +13.4 |
| Re1-N1-N2-C         | -2.9  | 3.3   | +6.2 | 14.3   | -13.8  | -28.1 | -20.9  | -22.5  | -1.6  |
| Re2-O2-C-N1         | -     | -     | -    | 10.8   | -27.3  | -38.1 | -37.2  | -23.0  | +14.2 |
| Re2-N2-N1-C         | -     | -     | -    | 25.8   | 13.8   | -12.0 | -20.2  | -19.6  | +0.6  |
| C2C-N1-N2-C1C       | 168.2 | 162.9 | -5.3 | 175.3  | -179.9 | +4.8  | -172.9 | -172.2 | +0.7  |
| Re1-N1-N2-Re2       | -     | -     | -    | -135.2 | -180.0 | -44.8 | 131.9  | 130.0  | -1.9  |

<sup>a</sup> Δ = differences between neutral and reduced species.

**Table S3B.** Selected DFT-calculated metrics of [Re], *anti*-[Re]<sub>2</sub> and *syn*-[Re]<sub>2</sub>; M06-2X/ def2TZVP/LANL2DZ for Re/CPCM(THF) level of theory.

| Bond length (Å)     | [Re]            | <i>anti</i> -<br>[Re] <sub>2</sub> | <i>syn</i> -<br>[Re] <sub>2</sub> |  | Angles (°)   | [Re]    | <i>anti</i> -[Re] <sub>2</sub> | <i>syn</i> -[Re] <sub>2</sub> |
|---------------------|-----------------|------------------------------------|-----------------------------------|--|--------------|---------|--------------------------------|-------------------------------|
| Re1-Cl1             | 2.539           | 2.526                              | 2.522                             |  | Cl1-Re1-N1   | 81.983  | 80.188                         | 83.154                        |
| Re2-Cl2             | -               | 2.525                              | 2.522                             |  | Cl2-Re2-N2   | -       | 78.171                         | 83.153                        |
| Re1-C3              | 1.897           | 1.907                              | 1.906                             |  | Cl1-Re1-O1   | 79.499  | 80.359                         | 80.362                        |
| Re1-C4              | 1.891           | 1.885                              | 1.884                             |  | Cl2-Re2-O2   | -       | 81.543                         | 80.362                        |
| Re1-C5              | 1.923           | 1.884                              | 1.915                             |  | Cl1-Re1-C3   | 175.908 | 172.452                        | 173.324                       |
| Re2-C6              | -               | 1.904                              | 1.906                             |  | Cl2-Re2-C6   | -       | 176.965                        | 173.324                       |
| Re2-C7              | -               | 1.891                              | 1.884                             |  | C4-Re1-O1    | 169.238 | 173.390                        | 174.498                       |
| Re2-C8              | -               | 1.915                              | 1.915                             |  | C7-Re2-O2    | -       | 169.494                        | 174.500                       |
| Re1-N1              | 2.197           | 2.442                              | 2.249                             |  | C5-Re1-N1    | 169.894 | 162.962                        | 168.071                       |
| Re2-N2              | -               | 2.242                              | 2.249                             |  | C8-Re2-N2    | -       | 167.167                        | 168.070                       |
| Re1-O1              | 2.239           | 2.260                              | 2.286                             |  | O1-Re1-N1    | 69.081  | 68.862                         | 69.953                        |
| Re2-O2              | -               | 2.210                              | 2.286                             |  | O2-Re2-N2    | -       | 68.183                         | 69.953                        |
| N1-N2               | 1.228           | 1.236                              | 1.239                             |  | Re1-O1-C1    | 112.957 | 109.339                        | 107.443                       |
| N1-C2               | 1.481           | 1.478                              | 1.474                             |  | Re2-O2-C2    | -       | 119.220                        | 107.442                       |
| N2-C1               | 1.460           | 1.473                              | 1.474                             |  | Re1-N1-N2    | 122.283 | 111.329                        | 117.331                       |
| N3-C1               | 1.311           | 1.306                              | 1.304                             |  | Re2-N2-N1    | -       | 121.172                        | 117.329                       |
| N4-C2               | 1.326           | 1.311                              | 1.304                             |  | C1-N2-N1     | 110.349 | 113.939                        | 111.219                       |
| C1-O1               | 1.242           | 1.232                              | 1.236                             |  | O1-C1-N2     | 119.318 | 115.689                        | 115.251                       |
| C2-O2               | 1.207           | 1.235                              | 1.236                             |  | C2-N1-N2     | 113.948 | 109.719                        | 111.220                       |
| C3-O3               | 1.145           | 1.141                              | 1.141                             |  | N3-C1-N2     | 114.861 | 115.985                        | 116.551                       |
| C4-O4               | 1.143           | 1.143                              | 1.144                             |  | N4-C2-N1     | 114.724 | 117.337                        | 116.550                       |
| C5-O5               | 1.138           | 1.140                              | 1.136                             |  | O2-C2-N1     | 115.841 | 117.816                        | 115.250                       |
| C6-O6               | -               | 1.143                              | 1.141                             |  | O1-C1-N3     | 125.766 | 128.188                        | 128.196                       |
| C7-O7               | -               | 1.143                              | 1.144                             |  | O2-C2-N4     | 129.357 | 124.833                        | 128.196                       |
| C8-O8               | -               | 1.137                              | 1.136                             |  |              |         |                                |                               |
| Re1...Re2           | -               | 5.105                              | 5.011                             |  |              |         |                                |                               |
| Dihedral angles (°) |                 |                                    |                                   |  |              |         |                                |                               |
| O1-C1-N2-N1         | -<br>15.94<br>4 | 47.009                             | 45.311                            |  |              |         |                                |                               |
| O2-C2-N1-N2         | 88.04<br>3      | 17.144                             | 45.314                            |  | Re1-N1-N2-C1 | -4.930  | -14.629                        | -15.639                       |

|              |            |         |         |  |               |   |         |         |
|--------------|------------|---------|---------|--|---------------|---|---------|---------|
| Re1-O1-C1-N2 | 27.40<br>3 | -52.060 | -47.968 |  | Re2-N2-N1-C2  | - | -22.795 | -15.638 |
| Re2-O2-C2-N1 | -          | -3.886  | -47.971 |  | Re1-N1-N2-Re2 | - | 137.429 | 141.065 |

**Table S4.** Experimental IR data of adc ligands and Re complexes.<sup>a</sup>

| Compound                                                       | $\nu_{\text{CO}}$ | Re(CO) |      |      | $\nu_{\text{CO}}$ | ligand |
|----------------------------------------------------------------|-------------------|--------|------|------|-------------------|--------|
| [Re(CO) <sub>5</sub> Cl]                                       | 2050              | 1983   |      |      |                   |        |
| [Re <sub>2</sub> ( $\mu$ -Cl) <sub>2</sub> (CO) <sub>8</sub> ] | 2143              | 1998   | 1920 | 1885 |                   |        |
| adcpip                                                         |                   |        |      |      | 1704              |        |
| [Re(CO) <sub>3</sub> Cl(adcpip)]                               | 2040              | 1960   | 1920 |      | 1725              | 1640   |
| [{Re(CO) <sub>3</sub> Cl} <sub>2</sub> ( $\mu$ -adcpip)]       | 2015              | 1913   |      |      | 1590              |        |
| pacOEt                                                         |                   |        |      |      | 1788              |        |
| [Re(CO) <sub>3</sub> Cl(pacOEt)]                               | 2022              | 1962   | 1928 |      | 1482              |        |
| adcOEt                                                         |                   |        |      |      | 1778              |        |
| [{Re(CO) <sub>3</sub> Cl} <sub>2</sub> ( $\mu$ -adcOEt)]       | 2019              | 1916   |      |      | 1667              |        |
| adcOiPr                                                        |                   |        |      |      | 1773              |        |
| [{Re(CO) <sub>3</sub> Cl} <sub>2</sub> ( $\mu$ -adcOiPr)]      | 2021              | 1919   |      |      | 1665              |        |
| adcOBzl                                                        |                   |        |      |      | 1756              |        |
| adcOtBu                                                        |                   |        |      |      | 1768              |        |

<sup>a</sup> Measured in CH<sub>2</sub>Cl<sub>2</sub> or DCE solution.

**Table S5.** Electrochemical data of adc ligands.<sup>a</sup>

| Compound | $E_{1/2}$ Red1 | $E_{\text{pc}}$ Red2 | $\Delta E$ Red1-Red2 |
|----------|----------------|----------------------|----------------------|
| adcpip   | -1.52          | -2.25                | 0.73                 |
| adcOtBu  | -1.20          | -1.84                | 0.64                 |
| adcOEt   | -1.02          | -1.65                | 0.63                 |
| adcOiPr  | -1.03          | -1.67                | 0.64                 |
| adcOBzl  | -0.91          | -1.60                | 0.69                 |
| pacOEt   | -1.96          | -                    | -                    |

<sup>a</sup> Potentials in V vs ferrocene/ferrocenium, recorded in 0.1 M *n*Bu<sub>4</sub>NPF<sub>6</sub>/CH<sub>2</sub>Cl<sub>2</sub>, half-wave potentials  $E_{1/2}$  for reversible waves and  $E_{\text{pc}}$  = cathodic peak potential for irreversible waves, scan rate = 100 mV/s.

**Table S6.** Selected X-band EPR data of reduced Re complexes.<sup>a</sup>

| Assumed Compound                                                              | $g_{\text{iso}}$ | $A_{\text{Re}} / \text{G}$ | ref.      |
|-------------------------------------------------------------------------------|------------------|----------------------------|-----------|
| [{Re(CO) <sub>3</sub> Cl} <sub>2</sub> ( $\mu$ -adcpip)] <sup>•-</sup>        | 2.0165           | 22.2                       | this work |
| [Re(CO) <sub>3</sub> (CH <sub>2</sub> Cl <sub>2</sub> )(adcpip)] <sup>•</sup> | 2.0167           | 30.8                       | this work |
| [Re(CO) <sub>3</sub> (MeCN)(adcpip)] <sup>•</sup>                             | 2.0177           | 42.7                       | this work |
| [Re(CO) <sub>3</sub> (NEt <sub>3</sub> )(adcpip)] <sup>•</sup>                | 2.0188           | 23.3                       | this work |
| [Re(CO) <sub>3</sub> (PPh <sub>3</sub> )(adcpip)] <sup>•</sup> <sup>b</sup>   | 2.0192           | 41.8                       | this work |
|                                                                               |                  |                            |           |
| [Re(CO) <sub>3</sub> Cl(bpy)] <sup>•-</sup>                                   | 2.0032           | 12.0                       | 59        |
| [Re(CO) <sub>3</sub> Cl(apy)] <sup>•-</sup>                                   | 2.0041           | 23.8                       | 47        |

<sup>a</sup> Recorded at 298 K. <sup>b</sup>  $A_{\text{P}} = 115 \text{ G}$ .

**Table S7.** UV-vis long-wavelength absorption maximum of [{Re(CO)<sub>3</sub>Cl}<sub>2</sub>( $\mu$ -adcpip)].<sup>a</sup>

| $\lambda_{\text{max}} / \text{nm}$ | $\nu_{\text{max}} / \text{cm}^{-1}$ | solvent                         | $E_{\text{T}}$ | $E^*_{\text{MLCT}}$ | $\epsilon_{\text{r}}$ | $\mu_0$ | AN   |
|------------------------------------|-------------------------------------|---------------------------------|----------------|---------------------|-----------------------|---------|------|
| 869                                | 11510                               | toluene                         | 33.9           | 0.30                | 2.4                   | 0.4     | 3.3  |
| 853                                | 11710                               | Et <sub>2</sub> O               | 34.6           | 0.32                | 4.2                   | 1.25    |      |
| 839                                | 11910                               | THF                             | 37.4           | 0.59                | 7.4                   | 1.7     | 8    |
| 852                                | 11940                               | CH <sub>2</sub> Cl <sub>2</sub> | 41.1           | 0.67                | 8.9                   | 1.5     | 20.4 |
| 842                                | 11880                               | DCE                             | 41.9           | 0.64                | 10.4                  | 1.75    |      |
| 827                                | 12090                               | acetone                         | 42.2           | 0.82                | 20.7                  | 2.7     | 12.5 |
| 822                                | 12170                               | MeCN                            | 46.0           | 0.90                | 37.5                  | 3.5     | 18.9 |
| 811                                | 12330                               | DMSO                            | 45.0           | 1.00                | 48.9                  | 3.9     | 19.3 |

<sup>a</sup> Measured in THF, absorption maxima  $\lambda$  in nm.  $E_{\text{T}}$  = Dimroth-Reichardt parameter in kcal/mol,[1]  $E^*_{\text{MLCT}}$  = solvent parameter by Manuta and Lees,[2,3]  $\epsilon_{\text{r}}$  = relative dielectricity constant at 25°C,[1]  $\mu_0$  = dipolar moment in Debye at 25°C,[1] AN = Gutman acceptor number.[4]

**Table S8.** Selected TD-DFT calculated vertical  $S_0 \rightarrow S_n$  transitions for [Re]; TPSSH/def2-TZVP(+def2-ECP for Re)/CPCMC(THF) level of theory.

| n  | wavelength (nm) | $f_{osc}$ | participating MOs (contribution)                             |
|----|-----------------|-----------|--------------------------------------------------------------|
| 1  | 846.2           | 0.00349   | HOMO→LUMO (91%), H-1→LUMO (8%)                               |
| 2  | 675.8           | 0.00131   | H-2→LUMO (99%)                                               |
| 3  | 571.7           | 0.03337   | H-3→LUMO (66%), H-1→LUMO (28%)                               |
| 4  | 502.9           | 0.10666   | H-1→LUMO (44%), H-3→LUMO (32%), H-5→LUMO (11%)               |
| 5  | 450.5           | 0.05503   | H-4→LUMO (85%), H-5→LUMO (5%)                                |
| 6  | 390.0           | 0.06197   | H-5→LUMO (59%), H-6→LUMO (25%), H-8→LUMO (5%)                |
| 7  | 374.0           | 0.13825   | H-6→LUMO (64%), H-5→LUMO (14%), H-7→LUMO (8%), H-4→LUMO (5%) |
| 8  | 341.8           | 0.05311   | H-7→LUMO (47%), H-8→LUMO (42%)                               |
| 9  | 317.3           | 0.03743   | H-8→LUMO (46%), H-7→LUMO (31%)                               |
| 10 | 309.3           | 0.01029   | HOMO→L+1 (84%)                                               |
| 16 | 282.6           | 0.01250   | HOMO→L+2 (57%), H-2→L+1 (17%), H-1→H+2 (14%)                 |
| 18 | 270.0           | 0.01932   | H-1→L+2 (30%), HOMO→L+2 (21%), HOMO→L+3 (20%), H-2→L+1 (16%) |
| 21 | 263.3           | 0.02261   | H-15→LUMO (81%), H-16→LUMO (6%)                              |
| 22 | 254.9           | 0.01078   | H-2→L+2 (37%), H-1→L+3 (17%), H-1→L+2 (13%), H-2→L+1 (12%)   |
| 25 | 248.1           | 0.01884   | HOMO→L+4 (50%), HOMO→L+3 (32%)                               |
| 30 | 240.7           | 0.01332   | H-3→L+1 (47%), H-1→L+4 (25%), H-2→L+3 (21%)                  |
| 33 | 234.8           | 0.01313   | H-3→L+2 (57%), H-1→L+5 (8%), H-1→L+6 (8%), H-1→L+4 (5%)      |

**Table S9.** Selected TD-DFT calculated vertical  $S_0 \rightarrow S_n$  transitions for *anti*-[Re]<sub>2</sub>; TPSSH/def2-TZVP(+def2-ECP for Re)/CPCMC(THF) level of theory.

| n  | wavelength (nm) | $f_{osc}$ | participating MOs (contribution)                                            |
|----|-----------------|-----------|-----------------------------------------------------------------------------|
| 1  | 1219.1          | 0.00285   | H-1→LUMO (98%)                                                              |
| 2  | 1208.3          | 0.00223   | H-2→LUMO (93%)                                                              |
| 3  | 846.9           | 0.00521   | H-4→LUMO (69%), H-3→LUMO (27%)                                              |
| 4  | 764.7           | 0.04486   | H-5→LUMO (64%), H-3→LUMO (16%), HOMO→LUMO (12%), H-4→LUMO (6%)              |
| 5  | 750.8           | 0.25761   | HOMO→LUMO (62%), H-4→LUMO (14%), H-3→LUMO (9%)                              |
| 6  | 597.4           | 0.13804   | H-3→LUMO (38%), H-5→LUMO (29%), H-4→LUMO (9%), HOMO→LUMO (7%)               |
| 7  | 561.7           | 0.08000   | H-6→LUMO (91%)                                                              |
| 8  | 531.0           | 0.00727   | H-7→LUMO (93%)                                                              |
| 9  | 449.7           | 0.07208   | H-8→LUMO (58%), H-9→LUMO (37%)                                              |
| 10 | 428.5           | 0.03500   | H-10→LUMO (64%), H-9→LUMO (23%), H-8→LUMO (8%)                              |
| 11 | 419.3           | 0.18703   | H-9→LUMO (36%), H-10→LUMO (34%), H-8→LUMO (22%)                             |
| 12 | 365.7           | 0.01270   | H-12→LUMO (75%), H-11→LUMO (18%)                                            |
| 13 | 360.5           | 0.03091   | H-11→LUMO (43%), H-12→LUMO (19%), H-14→LUMO (14%), H-13→LUMO (8%)           |
| 20 | 316.8           | 0.01478   | HOMO→L+1 (91%)                                                              |
| 21 | 308.2           | 0.02848   | H-2→L+1 (74%), HOMO→L+2 (8%)                                                |
| 25 | 302.4           | 0.01083   | H-1→L+1 (37%), H-1→L+2 (17%), HOMO→L+2 (13%), H-20→LUMO (11%), H-2→L+1 (8%) |

**Table S10.** Selected TD-DFT calculated vertical  $S_0 \rightarrow S_n$  transitions for *syn*-[Re]<sub>2</sub>; TPSSH/def2-TZVP(+def2-ECP for Re)/CPCMC(THF) level of theory.

| n  | wavelength (nm) | $f_{osc}$ | participating MOs (contribution)                                                           |
|----|-----------------|-----------|--------------------------------------------------------------------------------------------|
| 1  | 1194.9          | 0.00278   | H-1→LUMO (98%)                                                                             |
| 2  | 1181.3          | 0.00048   | H-2→LUMO (99%)                                                                             |
| 3  | 778.0           | 0.00099   | H-4→LUMO (72%), H-3→LUMO (27%)                                                             |
| 4  | 718.8           | 0.00222   | H-5→LUMO (56%), H-3→LUMO (30%), H-4→LUMO (13%)                                             |
| 5  | 641.4           | 0.38674   | HOMO→LUMO (86%), H-8→LUMO (7%)                                                             |
| 6  | 545.0           | 0.01656   | H-5→LUMO (35%), H-3→LUMO (35%), H-4→LUMO (11%), H-6→LUMO (7%), H-11→LUMO (6%)              |
| 7  | 531.2           | 0.03270   | H-6→LUMO (88%)                                                                             |
| 8  | 516.2           | 0.00585   | H-7→LUMO (95%)                                                                             |
| 9  | 438.1           | 0.01918   | H-9→LUMO (96%)                                                                             |
| 10 | 423.7           | 0.04709   | H-10→LUMO (34%), H-8→LUMO (32%)                                                            |
| 11 | 406.5           | 0.14651   | H-8→LUMO (56%), H-10→LUMO (34%), HOMO→LUMO (5%)                                            |
| 12 | 360.5           | 0.04086   | H-11→LUMO (68%), H-12→LUMO (10%), H-17→LUMO (9%)                                           |
| 13 | 361.3           | 0.02259   | H-12→LUMO (87%), H-11→LUMO (7%)                                                            |
| 18 | 321.6           | 0.01863   | HOMO→L+1 (92%)                                                                             |
| 20 | 313.5           | 0.01058   | HOMO→L+2 (44%), H-2→L+1 (32%), H-1→L+2 (9%), H-1→L+1 (6%)                                  |
| 22 | 311.8           | 0.01151   | H-1→L+1 (45%), H-2→L+1 (12%), L-18→LUMO (9%), H-20→LUMO (9%), H-2→L+2 (6%), L-17→LUMO (5%) |
| 23 | 308.9           | 0.01668   | H-19→LUMO (77%), HOMO→L+2 (9%)                                                             |
| 24 | 307.3           | 0.01432   | HOMO→L+2 (38%), H-2→L+1 (18%), H-19→LUMO (15%), H-1→L+1 (9%), H-1→L+2 (8%)                 |

**Table S11.** DFT-calculated absorptions and character of calculated transitions for [Re]<sub>2</sub>; M06-2X/def2TZVP/LANL2DZ for Re/CPCMC(THF) level of theory.<sup>a</sup>

| Excited state            | Oscillator Strength | Calculated $\lambda$ (nm) | Transitions (Major Contribution) | Assignment                                      |
|--------------------------|---------------------|---------------------------|----------------------------------|-------------------------------------------------|
| $S_0 \rightarrow S_1$    | 0.028               | 439.48                    | H-1→LUMO (23%)                   | MLCT/XLCT/L'LCT/IL                              |
|                          |                     |                           | H-7→LUMO (22%)                   | IL/XLCT                                         |
|                          |                     |                           | H-5→LUMO (18%)                   | XLCT/IL/MLCT                                    |
|                          |                     |                           | H-2→LUMO (16%)                   | MLCT/ L'LCT                                     |
| $S_0 \rightarrow S_3$    | 0.099               | 383.68                    | H-1→LUMO (58%)                   | MLCT/XLCT/L'LCT/IL                              |
|                          |                     |                           | H-2→LUMO (34%)                   | MLCT/ L'LCT                                     |
| $S_0 \rightarrow S_4$    | 0.045               | 355.97                    | H-2→LUMO (48%)                   | MLCT/ L'LCT                                     |
|                          |                     |                           | H-7→LUMO (14%)                   | IL/XLCT                                         |
|                          |                     |                           | H-1→LUMO (13%)                   | MLCT/XLCT/L'LCT/IL                              |
|                          |                     |                           | H-5→LUMO (13%)                   | XLCT/IL/MLCT                                    |
| $S_0 \rightarrow S_6$    | 0.087               | 291.21                    | H-4→LUMO (98%)                   | IL/XLCT                                         |
| $S_0 \rightarrow S_7$    | 0.020               | 281.89                    | HOMO→L+1 (70%)                   | MLCT/MMCT/ML'CT/L'LCT/L'MCT/IL'/XLCT/XMCT/XL'CT |
| $S_0 \rightarrow S_{10}$ | 0.026               | 263.76                    | HOMO→L+2 (34%)                   | MLCT/MMCT/ML'CT/L'LCT/L'MCT/IL'/XLCT/XMCT/XL'CT |
|                          |                     |                           | H-2→L+1 (27%)                    | MLCT/MMCT/ML'CT/L'LCT/L'MCT/IL'                 |
|                          |                     |                           | H-5→LUMO (10%)                   | XLCT/IL/MLCT                                    |
| $S_0 \rightarrow S_{11}$ | 0.034               | 256.13                    | H-6→LUMO (77%)                   | XLCT/IL/MLCT                                    |
| $S_0 \rightarrow S_{12}$ | 0.066               | 252.17                    | H-2→L+1 (37%)                    | MLCT/MMCT/ML'CT/ L'LCT/L'MCT/IL'                |
|                          |                     |                           | HOMO→L+2 (26%)                   | MLCT/MMCT/ML'CT/L'LCT/L'MCT/IL'/XLCT/XMCT/XL'CT |
| $S_0 \rightarrow S_{13}$ | 0.020               | 247.74                    | H-4→L+2 (48%)                    | IL/LMCT/LL'CT/XLCT/XMCT/XL'CT                   |
|                          |                     |                           | H-2→L+2 (15%)                    | MLCT/MMCT/ML'CT/ L'LCT/L'MCT/IL'                |
| $S_0 \rightarrow S_{14}$ | 0.040               | 241.02                    | H-2→L+2 (23%)                    | MLCT/MMCT/ML'CT/ L'LCT/L'MCT/IL'                |

|                          |       |        |                 |                                                                   |
|--------------------------|-------|--------|-----------------|-------------------------------------------------------------------|
|                          |       |        | H-13→LUMO (21%) | IL                                                                |
|                          |       |        | H-7→LUMO (17%)  | IL/XLCT                                                           |
|                          |       |        | H-9→LUMO (13%)  | IL                                                                |
| $S_0 \rightarrow S_{15}$ | 0.059 | 239.79 | H-2→L+2 (39%)   | MLCT/MMCT/ML'CT/ L'LCT/L'MCT/IL'                                  |
|                          |       |        | H-13→LUMO (13%) | IL                                                                |
|                          |       |        | H-1→L+2 (13%)   | MLCT/MMCT/ML'CT/XLCT/XMCT/XL'CT/L'LCT/L'MC<br>T/IL'/IL/LMCT/LL'CT |
| $S_0 \rightarrow S_{16}$ | 0.066 | 235.90 | H-8→LUMO (63%)  | XLCT/IL/L'LCT                                                     |
|                          |       |        | H-7→LUMO (12%)  | IL/XLCT                                                           |
| $S_0 \rightarrow S_{37}$ | 0.024 | 181.56 | H-1→L+7 (16%)   | MLCT/MMCT/ML'CT/XLCT/XMCT/XL'CT/L'LCT/L'MC<br>T/IL'/IL/LMCT/LL'CT |
| $S_0 \rightarrow S_{39}$ | 0.023 | 179.56 | H-4→L+2 (27%)   | IL/LMCT/LL'CT/XLCT/XMCT/XL'CT                                     |
|                          |       |        | H-5→L+2 (11%)   | XLCT/XMCT/XL'CT/IL/LMCT/LL'CT/MLCT/MMCT/ML'<br>CT                 |
| $S_0 \rightarrow S_{43}$ | 0.046 | 177.04 | H-15→LUMO (56%) | IL                                                                |
| $S_0 \rightarrow S_{44}$ | 0.074 | 176.61 | H-3→L+1 (37%)   | IL/LMCT/LL'CT                                                     |

<sup>a</sup> M = Re, L = adcpip, L' = CO, and X = Cl.

**Table S12.** DFT-calculated absorptions and character of DFT-calculated transitions for *anti*-[Re]<sub>2</sub>; M06-2X/def2TZVP/LANL2DZ for Re/CPCM(THF) level of theory.<sup>a</sup>

| Excited state            | Oscillator Strength | Calculated $\lambda$ (nm) | Transitions (Major Contribution) | Assignment                                                        |
|--------------------------|---------------------|---------------------------|----------------------------------|-------------------------------------------------------------------|
| $S_0 \rightarrow S_3$    | 0.144               | 523.08                    | H-2→LUMO (82%)                   | MLCT/XLCT/L'LCT                                                   |
|                          |                     |                           | H-3→LUMO (14%)                   | MLCT/XLCT/L'LCT/IL                                                |
| $S_0 \rightarrow S_4$    | 0.027               | 512.21                    | H-3→LUMO (54%)                   | MLCT/XLCT/L'LCT/IL                                                |
|                          |                     |                           | H-4→LUMO (17%)                   | MLCT/L'LCT                                                        |
|                          |                     |                           | H-2→LUMO (15%)                   | MLCT/XLCT/L'LCT                                                   |
| $S_0 \rightarrow S_7$    | 0.050               | 372.36                    | H-6→LUMO (72%)                   | XLCT/IL                                                           |
| $S_0 \rightarrow S_9$    | 0.079               | 329.00                    | H-7→LUMO (39%)                   | XLCT/IL                                                           |
|                          |                     |                           | H-8→LUMO (15%)                   | XLCT/MLCT/IL                                                      |
| $S_0 \rightarrow S_{10}$ | 0.022               | 316.74                    | H-8→LUMO (74%)                   | XLCT/MLCT/IL                                                      |
| $S_0 \rightarrow S_{11}$ | 0.023               | 302.06                    | H-9→LUMO (35%)                   | XLCT/MLCT/IL                                                      |
|                          |                     |                           | H-11→LUMO (25%)                  | IL/XLCT/MLCT                                                      |
|                          |                     |                           | HOMO→L+1 (21%)                   | MLCT/ML'CT/MMCT/L'LCT/IL'/L'MCT/XLCT/XL'CT/X<br>MCT               |
| $S_0 \rightarrow S_{12}$ | 0.035               | 296.10                    | H-10→LUMO (63%)                  | XLCT/IL/MLCT/L'LCT                                                |
|                          |                     |                           | HOMO→L+1 (12%)                   | MLCT/ML'CT/MMCT/L'LCT/IL'/L'MCT/XLCT/XL'CT/X<br>MCT               |
| $S_0 \rightarrow S_{14}$ | 0.038               | 291.42                    | HOMO→L+1 (42%)                   | MLCT/ML'CT/MMCT/L'LCT/IL'/L'MCT/XLCT/XL'CT/X<br>MCT               |
|                          |                     |                           | H-11→LUMO (25%)                  | IL/XLCT/MLCT                                                      |
| $S_0 \rightarrow S_{16}$ | 0.031               | 280.25                    | H-12→LUMO (67%)                  | XLCT/IL/L'LCT/MLCT                                                |
| $S_0 \rightarrow S_{22}$ | 0.063               | 263.05                    | H-4→L+1 (30%)                    | MLCT/ML'CT/MMCT/L'LCT/IL'/L'MCT                                   |
|                          |                     |                           | H-5→L+1 (19%)                    | MLCT/ML'CT/MMCT/L'LCT/IL'/L'MCT                                   |
| $S_0 \rightarrow S_{23}$ | 0.030               | 255.89                    | H-2→L+3 (26%)                    | MMCT/MLCT/ML'CT/XMCT/XLCT/XL'CT/L'MCT/L'LC<br>T/IL'               |
|                          |                     |                           | H-3→L+4 (17%)                    | ML'CT/MMCT/MLCT/XL'CT/XMCT/XLCT/IL'/L'MCT/L'<br>LCT/LL'CT/LMCT/IL |
|                          |                     |                           | H-2→L+2 (12%)                    | MLCT/MMCT/ML'CT/XLCT/XMCT/XL'CT/L'LCT/L'MC<br>T/IL'               |
| $S_0 \rightarrow S_{24}$ | 0.036               | 253.70                    | H-5→L+2 (14%)                    | MLCT/MMCT/ML'CT/ L'LCT/L'MCT/IL'                                  |
|                          |                     |                           | H-1→L+3 (14%)                    | MMCT/MLCT/ML'CT/XMCT/XLCT/XL'CT/L'MCT/L'LC<br>T/IL'               |
|                          |                     |                           | H-4→L+2 (12%)                    | MLCT/MMCT/ML'CT/L'LCT/L'MCT/IL'                                   |
| $S_0 \rightarrow S_{26}$ | 0.070               | 249.04                    | H-5→L+2 (16%)                    | MLCT/MMCT/ML'CT/ L'LCT/L'MCT/IL'                                  |
|                          |                     |                           | H-3→L+3 (16%)                    | MMCT/MLCT/ML'CT/XMCT/XLCT/XL'CT/<br>L'MCT/L'LCT/IL'/LMCT/IL/LL'CT |

|                          |       |        |                |                                                                |
|--------------------------|-------|--------|----------------|----------------------------------------------------------------|
|                          |       |        | H-2→L+4 (14%)  | ML'CT/MMCT/MLCT/XL'CT/XMCT/XLCT/IL'/L'MCT/L'LCT/               |
| $S_0 \rightarrow S_{41}$ | 0.070 | 205.33 | HOMO→L+5 (22%) | MLCT/MMCT/ML'CT/L'LCT/L'MCT/IL'/XLCT/XMCT/XL'CT                |
| $S_0 \rightarrow S_{42}$ | 0.027 | 203.53 | H-3→L+1 (19%)  | MLCT/ML'CT/MMCT/XLCT/XL'CT/XMCT/L'LCT/IL'/L'MCT/IL/LL'CT/LMCT/ |
|                          |       |        | H-2→L+1 (18%)  | MLCT/ML'CT/MMCT/XLCT/XL'CT/XMCT/L'LCT/IL'/L'MCT                |

<sup>a</sup> M = Re, L = adcpip, L' = CO, and X = Cl.

**Table S13.** DFT-calculated absorptions and character of calculated transitions for *syn*-[Re]<sub>2</sub>; M06-2X/def2TZVP/LANL2DZ for Re/CPCM(THF) level of theory.<sup>a</sup>

| Excited state            | Oscillator Strength | Calculated $\lambda$ (nm) | Transitions (Major Contribution) | Assignment                                                    |
|--------------------------|---------------------|---------------------------|----------------------------------|---------------------------------------------------------------|
| $S_0 \rightarrow S_3$    | 0.230               | 504.09                    | HOMO→LUMO (95%)                  | MLCT/IL/XLCT/L'LCT                                            |
| $S_0 \rightarrow S_7$    | 0.026               | 350.80                    | H-6→LUMO (32%)                   | IL/XLCT                                                       |
|                          |                     |                           | H-8→LUMO (19%)                   | XLCT/IL/MLCT                                                  |
| $S_0 \rightarrow S_9$    | 0.065               | 316.50                    | H-6→LUMO (58%)                   | IL/XLCT                                                       |
|                          |                     |                           | H-8→LUMO (29%)                   | XLCT/IL/MLCT                                                  |
| $S_0 \rightarrow S_{14}$ | 0.031               | 285.73                    | H-10→LUMO (72%)                  | IL/XLCT/MLCT                                                  |
|                          |                     |                           | HOMO→L+1 (12%)                   | MLCT/ML'CT/MMCT/IL/LL'CT/LMCT/XLCT/XL'CT/XMCT/L'LCT/IL'/L'MCT |
| $S_0 \rightarrow S_{16}$ | 0.057               | 282.68                    | H-8→LUMO (39%)                   | XLCT/IL/MLCT                                                  |
|                          |                     |                           | H-14→LUMO (15%)                  | IL                                                            |
| $S_0 \rightarrow S_{18}$ | 0.045               | 268.35                    | H-4→L+1 (30%)                    | MLCT/ML'CT/MMCT/IL/L'LCT/IL'/L'MCT                            |
|                          |                     |                           | H-5→L+2 (23%)                    | MLCT/ML'CT/MMCT/IL/L'LCT/IL'/L'MCT                            |
| $S_0 \rightarrow S_{19}$ | 0.033               | 267.40                    | H-4→L+2 (29%)                    | MLCT/ML'CT/MMCT/IL/L'LCT/IL'/L'MCT                            |
|                          |                     |                           | H-5→L+1 (26%)                    | MLCT/ML'CT/MMCT/IL/L'LCT/IL'/L'MCT                            |
| $S_0 \rightarrow S_{23}$ | 0.053               | 255.92                    | H-2→L+3 (29%)                    | MLCT/ML'CT/MMCT/XLCT/XL'CT/XMCT/L'LCT/IL'/L'MCT               |
|                          |                     |                           | H-1→L+4 (17%)                    | MMCT/MLCT/ML'CT/L'MCT/L'LCT/IL'/XMCT/XLCT/XL'CT               |
| $S_0 \rightarrow S_{24}$ | 0.040               | 246.51                    | HOMO→L+3 (29%)                   | MLCT/ML'CT/MMCT/IL/LL'CT/LMCT/XLCT/XL'CT/XMCT/L'LCT/IL'/L'MCT |
|                          |                     |                           | H-3→L+4 (18%)                    | MMCT/MLCT/ML'CT/XMCT/XLCT/XL'CT/L'MCT/L'LCT/IL'               |
|                          |                     |                           | H-1→L+3 (15%)                    | MLCT/ML'CT/MMCT/L'LCT/IL'/L'MCT/XLCT/XL'CT/XMCT               |
| $S_0 \rightarrow S_{41}$ | 0.063               | 205.49                    | H-3→L+2 (13%)                    | MLCT/ML'CT/MMCT/XLCT/XL'CT/XMCT/L'LCT/IL'/L'MCT               |

<sup>a</sup> M = Re, L = adcpip, L' = CO, and X = Cl.

## References

- [1] C. Reichardt, Solvatochromic Dyes as Solvent Polarity Indicators, *Chem. Rev.* **1994**, *94*, 2319–2358.
- [2] D. M. Manuta, A. J. Lees, Solvatochromism of the Metal to Ligand Charge-Transfer Transitions of Zerovalent Tungsten Carbonyl Complexes. *Inorg. Chem.* **1986**, *25*, 3212–3218.
- [3] W. Kaim, S. Kohlmann, S. Ernst, B. Olbrich-Deussner, C. Bessenbacher, A. Schulz, What determines the solvatochromism of metal-to-ligand charge transfer transitions? A demonstration involving 17 tungsten carbonyl complexes. *J. Organomet. Chem.* **1987**, *321*, 215–226.
- [4] U. Mayer, V. Gutmann, W. Gerger, The Acceptor Number – A Quantitative Empirical Parameter for the Electrophilic Properties of Solvents, *Monatsh. Chem.* **1975**, *106*, 1235–1257.
